# Supplementary material for: An accuracy assessment of satellite-based cotton yield estimation using panel data regression: a case study of Uzbekistan
Source: Springer Nature journal article supplement (doi:10.1007/s10668-024-05220-1), 2024-07-27
Supplement: MOESM1 [file 10668_2024_5220_MOESM1_ESM.docx]

**SUPPLEMENTARY MATERIAL**

**The full title:** An accuracy assessment of satellite-based cotton yield estimation using panel data regression: A case study of Uzbekistan

**Journal name:** Environment, Development and Sustainability

Supplementary Material

Supplementary Table S1. Reviewing existing literature for crop yield estimation

| **#** | **Title of the article** | **Authors** | **Crop type** | **Research scale (farmer, district, province, country)** | **Satellite type** | **Satellite resolution** | **Analysis period** | **Regression type** | **Publication year** |
| --- | --- | --- | --- | --- | --- | --- | --- | --- | --- |
| 1 | A scalable satellite-based crop yield mapper | David B. Lobell, David Thau, Christopher Seifert, Eric Engle, Bertis Little | Maize and Soybean | USA district scale | Landsat | 30x30m | 2008-2012 | linear regression (time series) | 2015 |
| 2 | Application note: Crop-loss assessment monitor – A multi-model and multistage decision support system | Pramod Aggarwal, Paresh Shirsath, Shalika Vyas, Ponraj Arumugam, Sheshakumar Goroshi, S. Aravind, Mansi Nagpal, Madhur Chanana | Soybean | India country scale | MODIS | 250x250m | 2010-2016 | linear regression (time series) | 2020 |
| 3 | Improving the accuracy of satellite-based high-resolution yield estimation: A test of multiple scalable approaches | Zhenong Jin, George Azzari, David B. Lobell | Maize | USA state scale | Landsat | 30x30m | 2001-2015 | linear regression (time series) | 2017 |
| 4 | Assessment of the effectiveness of spatiotemporal fusion of multi-source satellite images for cotton yield estimation | Linghua Menga, Huanjun Liua, Xinle Zhangb, Chunying Rena, Susan Ustinc, Zhengchao Qiub, Mengyuan Xub, Dong Guoa | Cotton | USA district scale | MODIS, Landsat | 250x250m, 30x30m | 2002 | linear regression (cross sectional) | 2019 |
| 5 | Satellite-based vegetation health indices as a criteria for insuringagainst drought-related yield losses | R. Bokushevaa, F. Koganb, I. Vitkovskayac, S. Conradta, M. Batyrbayeva | Wheat | Kazakhstan district scale | NOAA | 1.1x 1.1km | 1982-2010 | linear regression (time series) | 2016 |
| 6 | Machine learning approaches for rice crop yield predictions using time-series satellite data in Taiwan | Nguyen-Thanh Son, Chi-Farn Chen, Cheng-Ru Chen, Horng-Yuh Guo, YougSing Cheng, Shu-Ling Chen, Huan-Sheng Lin & Shih-Hsiang Chen | Rice | Taiwan country scale | MODIS | 250x250m | 2000-2018 | linear regression (time series) | 2020 |
| 7 | Assessing the applicability of NDVI data for the design of index-based agricultural insurance in Bihar, India | Irene Winklera, Mamta Mehrab, Sarah Favrichonb, Vaibhav Sharmab, Nihar Jangle | Rice, Maize and Wheat | India district scale | MODIS | 250x250m | 2001-2009 | linear regression analysis (time series) | 2015 |
| 8 | Wheat Yield Estimation from NDVI and Regional Climate Models in Latvia | Astrid Vannoppen, Anne Gobin, Lola Kotova, Sara Top, Lesley De Cruz, Andris Viksna, Svetlana Aniskevich, Leonid Bobylev, Lars Buntemeyer, Steven Caluwaerts, Rozemien De Troch, Natalia Gnatiuk, Rafiq Hamdi, Armelle Reca Remedio, Abdulla Sakalli, Hans Van De Vyver, Bert Van Schaeybroeck | Wheat | Latvia country scale | PROBA | 300x300m | 2014-2018 | linear regression analysis (time series) | 2020 |
| 9 | Integrated Application of Remote Sensing and GIS in Crop Information System—A Case Study on Aman Rice Production Forecasting Using MODIS-NDVI in Bangladesh | B. M. Refat Faisal, Hafizur Rahman, Nur Hossain Sharifee, Nasrin Sultana, | Rice | Bangladesh and Aman country scale | MODIS | 250x250m | 2011-2017 | linear regression analysis (time series) | 2020 |
| 10 | Predicting the Normalized Difference Vegetation Index (NDVI) by training a crop growth model with historical data | Mohammad Imrul Islam, S. M. Ahsan Habib and Tofayel Ahammad | Soybean | Uruguay province scale | MODIS | 250x250m | 2009-2015 | linear regression analysis (time series) | 2019 |
| 11 | Modeling of Cotton Yields in the Amu Darya River Floodplains of Uzbekistan Integrating Multitemporal Remote Sensing and Minimum Field Data | Zhou Shi, Gerd R. Ruecker, Marc Mueller, Christopher Conrad, Nazar Ibragimov, John P. A. Lamers, Christopher Martius, Guenter Strunz, Stefan Dech, and Paul L. G. Vlek | Cotton | Uzbekistan district scale | MODIS, Landsat | 500x500m, 30x30m | 1998-2001 | linear regression analysis (time series) | 2007 |
| 12 | Incorporating environmental variables into a MODIS-based crop yield estimation method for United States corn and soybeans through the use of a random forest regression algorithm | Toshihiro Sakamoto | Corn and Soybean | USA state scale | MODIS | 250x250m | 2000-2018 | linear regression analysis (time series) | 2020 |
| 13 | Eyes in the Sky, Boots on the Ground: Assessing Satellite‐ and Ground‐Based Approaches to Crop Yield Measurement and Analysis | David B. Lobell, George Azzari, Marshall Burke, Sydney Gourlay, Zhenong Jin, Talip Kilic, And Siobhan Murray | Maize | Eastern Uganda farmer scale | Sentinel | 10x10m | 2016 | linear regression analysis (cross-sectional) | 2020 |
| 14 | Satellite-based assessment of yield variation and its determinants in smallholder African systems | Marshall Burkea and David B. Lobella | Maize | Kenya farmer scale | SkySat | 1x1m | 2015 | linear regression analysis (cross-sectional) | 2017 |
| 15 | Regional yield estimation for winter wheat with MODIS-NDVI data in Shandong, China | Jianqiang Ren, Zhongxin Chen, Qingbo Zhou, Huajun Tang | Wheat | China province scale | MODIS | 250x250m | 2005-2006 | linear regression analysis (cross-sectional) | 2008 |
| 16 | Comparison of winter wheat NDVI data derived from Landsat 8 and active optical sensor at field scale | Dariusz Gozdowski, Michał Stępien, Ewa Panek, James Varghese, Elzbieta Bodecka, Jan Rozbicki, Stanisław Samborski | Wheat | Poland farmer scale | Landsat | 30x30m | 2013-2014 | linear regression analysis (cross-sectional) | 2020 |
| 17 | Wheat and maize yield forecasting for the Tisza river catchment using MODIS NDVI time series and reported crop statistics | Attila Nagy, János Fehér, János Tamás | Wheat and Maize | Central Eastern Europe county scale | MODIS | 250x250m | 2000-2015 | linear regression analysis (time series) | 2018 |
| 18 | An empirical model for prediction of wheat yield, using time-integrated Landsat NDVI | Y.R. Laia, M.J. Pringleb, P.M. Kopittkea, N.W. Menziesa, T.G. Ortona, Y.P. Dang | Wheat | Australia farmer scale | Landsat | 30x30m | 2001-2016 | linear regression analysis (time series) | 2018 |
| 19 | A study on trade-offs between spatial resolution and temporal sampling density for wheat yield estimation using both thermal and calendar time | Yetkin Özüm Durguna, Anne Gobinb, Grégory Duveillerd, Bernard Tychon | Wheat | France province scale | PROBA-V | 300x300m | 2015 | linear regression analysis (cross-sectional) | 2019 |
| 20 | Relationship between MODIS-NDVI data and wheat yield: a case study in Northern Buenos Aires province, Argentina | Mariano F. Lopresti, Carlos M. Di Bella, Américo J. Degioanni | Wheat | Argentina province scale | MODIS | 250x250m | 2003-2011 | linear regression analysis (time series) | 2015 |
| 21 | Estimation of harvest index in wheat crops using a remote sensing-based approach | Jaime Campoya, Isidro Camposa, Carmen Plazab, María Calerab, Vicente Bodasb, Alfonso Calera | Wheat | Spain province scale | Landsat 8 | 30x30m | 2015-2018 | linear regression analysis (time series) | 2020 |
| 22 | A simple model of regional wheat yield based on NDVI data | M. Moriondo, F. Maselli, M. Bindi | Wheat | Italy province scale | AVHRR | 1.1x1.1km | 1986-2003 | linear regression analysis (time series) | 2007 |
| 23 | Empirical regression models using NDVI, rainfall and temperature data for the early prediction of wheat grain yields in Morocco | Riad Balaghi, Bernard Tychon, Herman Eerens, Mohammed Jlibene | Wheat | Morocco province scale | AVHRR | 1.1x1.1km | 1990-2004 | linear regression analysis (time series) | 2008 |
| 24 | Estimating regional winter wheat yield by assimilation of time series of HJ-1 CCD NDVI into WOFOST–ACRM model with Ensemble Kalman Filter | Hongyuan Ma, Jianxi Huang, Dehai Zhua, Junming Liua, Wei Sua, Chao Zhang, Jinlong Fan | Wheat | China district scale | China Environment Satellite HJ-1A and B | 30x30m | 2009 | linear regression analysis (cross-sectional) | 2013 |
| 25 | Rapid mapping of winter wheat yield, protein, and nitrogen uptake using remote and proximal sensing | Ku Wanga, David R. Hugginsb, Haiying Tao | Wheat | USA farmer scale | RapidEye radiometry | 5x5m | 2017 | linear regression analysis (cross-sectional) | 2019 |
| 26 | Evaluation of MODIS and Landsat multiband vegetation indices used for wheat yield estimation in irrigated Indus Basin | Muhammad Usman Liaqat, Muhammad Jehanzeb Masud Cheema, Wenjiang Huang, Talha Mahmood, Muhammad Zaman, Muhammad Mohsin Khan | Wheat | Pakistan province scale | MODIS, Landsat | 250x250m, 30x30m | 2013-2014 | linear regression analysis (cross-sectional) | 2017 |
| 27 | Estimating wheat yields in Australia using climate records, satellite image time series and machine learning methods | Elisa Kamira, François Waldnera, Zvi Hochman | Wheat | Australia province scale | MODIS | 250x250m | 2009-2015 | linear regression analysis (time series) | 2020 |
| 28 | Characterizing major agricultural land change trends in the Western Corn Belt | Yang Shao, Gregory N. Taff, Jie Ren, James B. Campbell | Corn | USA state scale | MODIS | 250x250m | 2001-2015 | linear regression analysis (time series) | 2016 |
| 29 | National-scale soybean mapping and area estimation in the United States using medium resolution satellite imagery and field survey | Xiao-Peng Song, Peter V. Potapov, Alexander Krylov, LeeAnn King, Carlos M. Di Bella, Amy Hudson, Ahmad Khan, Bernard Adusei, Stephen V. Stehman, Matthew C. Hansen | Soybean | USA country scale | Landsat | 30x30m | 2015 | linear regression analysis (cross-sectional) | 2017 |
| 30 | Maize yield estimation in West Africa from crop process-induced combinations of multi-domain remote sensing indices | Louise Lerouxa, Mathieu Castets, Christian Baron, Maria-Jose Escorihuela, Agnès Bégué, Danny Lo Seen | Maize | Burkina-Faso province scale | MODIS | 250x250m | 2011-2016 | linear regression analysis (time series) | 2019 |
| 31 | Remote sensing-based framework to predict and assess the interannual variability of maize yields in Pakistan using Landsat imagery | Ishfaq Ahmad, Aditya Singh, Muhammad Fahad, Muhammad Mohsin Waqas | Maize | Pakistan district scale | Landsat | 30x30m | 2006-2017 | linear regression analysis (time series) | 2020 |
| 32 | Modelling paddy rice yield using MODIS data | Dailiang Peng, Jingfeng Huang, Cunjun Li, Liangyun Liu, Wenjiang Huang, Fuming Wang, Xiaohua Yang | Rice | China district scale | MODIS | 250x250m | 2005-2006 | linear regression analysis (cross-sectional) | 2014 |
| 33 | Cotton Yield Estimation Based on NOAA/AVHRR Produced NDVI | N.R.Dalezios, C.Domenikiotis, A.Loukas, S.T.Tzortzios, C.Kalaitzidis | Cotton | Greece district scale | AVHRR | 1.1x1.1km | 1994-1996 | linear regression analysis (time series) | 2001 |
| 34 | A comparative analysis of multitemporal MODIS EVI and NDVI data for large-scale rice yield estimation | N.T. Sona,∗, C.F. Chena,b, C.R. Chenb, V.Q. Minhc, N.H. Trung | Rice | Vietnam province scale | MODIS | 250x250m | 2002-2011 | linear regression analysis (time series) | 2014 |
| 35 | Application of phenology-based algorithm and linear regression model for estimating rice cultivated areas and yield using remote sensing data in Bansloi River Basin, Eastern India | Gopal Chandra Paul, Sunil Saha, Tusar Kanti Hembram | Rice | India province scale | Landsat | 30x30m | 2017 | linear regression analysis (cross-sectional) | 2020 |
| 36 | Recognition of different yield potentials among rain-fed wheat fields before harvest using the remote sensing | Hamed Sabzchi-Dehkharghani, Amir Hossein Nazemi, Ali Ashraf Sadraddini, Abolfazl Majnooni-Heris, Asim Biswas | Wheat | Iran province scale | MODIS, Landsat | 250x250m, 30x30m | 2015 | linear regression analysis (cross-sectional) | 2020 |
| 37 | Estimating winter wheat yield based on a light use efficiency model and wheat variety data | Jie Donga, Haibo Lub, Yawen Wang, Tao Yea, Wenping Yuan | Wheat | USA state scale | Landsat | 30x30m | 2008-2017 | linear regression analysis (cross-sectional) | 2020 |
| 38 | A comparison of harvest index estimation methods of winter wheat based on field measurements of biophysical and spectral data | Heli Li, Yi Luo, Xiaoping Xue, Yujin Zhao, Hong Zhao, Feng Li | Wheat | China province scale | MODIS | 250x250m | 2008-2010 | linear regression analysis (cross-sectional) | 2011 |
| 39 | Winter wheat biomass estimation based on spectral indices, band depth analysis and partial least squares regression using hyperspectral measurements | Yuanyuan Fu, Guijun Yang b, Jihua Wang, Xiaoyu Song, Haikuan Feng | Wheat | China district scale | MODIS | 250x250m | 2008-2009 | linear regression analysis (cross-sectional) | 2014 |
| 40 | High resolution wheat yield mapping using Sentinel-2 | Merryn L. Hunta, George Alan Blackburnb, Luis Carrascod, John W. Redhead, Clare S. Rowland | Wheat | United Kingdom farmer scale | Sentinel | 10x10m | 2016 | linear regression analysis (cross-sectional) | 2019 |
| 41 | Image masking for crop yield forecasting using AVHRR NDVI time series imagery | Jude H. Kastens, Terry L. Kastens, Dietrich L.A. Kastens, Kevin P. Price, Edward A. Martinko, Re-Yang Lee | Corn and Soybean | USA state scale | AVHRR | 1.1x1.1km | 1989 to 2000 | linear regression analysis (time series) | 2005 |
| 42 | Regression model to estimate flood impact on corn yield using MODIS NDVI and USDA cropland data layer | Ranjay Shrestha, Liping Di, Eugene G. Yu, Lingjun Kang, SHAO Yuan-zheng, BAI Yu-qi | Corn | USA state scale | MODIS | 250x250m | 2000–2014 | linear regression analysis (time series) | 2017 |
| 43 | The early explanatory power of NDVI in crop yield modelling | Lenny Wall , Denis Larocque & Pierre‐Majorique Léger | Wheat | Canada province scale | AVHRR | 1.1x1.1km | 1987-2002 | linear regression analysis (time series) | 1998 |
| 44 | Winter wheat yield forecasting in Ukraine based on Earth observation, meteorological data and biophysical models | Felix Kogana, Nataliia Kussul, Tatiana Adamenkoc, Sergii Skakun, Oleksii Kravchenko, Oleksii Kryvobok, Andrii Shelestov, Andrii Kolotii, Olga Kussul, Alla Lavrenyuk | Wheat | Ukrain district scale | MODIS | 250x250m | 2000–2010 | linear regression analysis (time series) | 2013 |
| 45 | Improved mapping and change detection of the start of the crop growing season in the US Corn Belt from long-term AVHRR NDV | Hyeon-Ju Gima, Chang-Hoi Ho, Sujong Jeong, Jinwon Kimc, Song Feng, Michael J. Hayes | Corn | USA state scale | AVHRR MODIS | 1.1x1.1km 250x250m | 1982–2015 | linear regression analysis (time series) | 2020 |
| 46 | Improving remotely-sensed crop monitoring by NDVI-based crop phenology estimators for corn and soybeans in Iowa and Illinois, USA | Bumsuk Seoa, Jihye Leeb, Kyung-Do Leed, Sukyoung Honge, Sinkyu Kang | Corn and Soybean | USA state scale | MODIS | 250x250m | 2003–2015 | linear regression analysis (time series) | 2019 |
| 47 | Potential of using spectral vegetation indices for corn green biomass estimation based on their relationship with the photosynthetic vegetation sub-pixel fraction | Luan Peroni Venancioa, Everardo Chartuni Mantovania, Cibele Hummel do Amaralb, Christopher Michael Usher Nealec, Ivo Zution Gonçalvesc, Roberto Filgueirasa, Fernando Coelho Eugenio | Corn | Brazil farmer scale | Landsat | 30x30m | 2015-2018 | linear regression analysis (time series) | 2019 |
| 48 | Using spatio-temporal fusion of Landsat-8 and MODIS data to derive phenology, biomass and yield estimates for corn and soybean | Chunhua Liao, Jinfei Wang, Taifeng Dong, Jiali Shang, Jiangui Liu\, Yang Song | Corn and Soybean | Canada farmer scale | Landsat | 30x30m | 2015 | linear regression analysis (cross-sectional) | 2019 |
| 49 | An assessment of pre- and within-season remotely sensed variables for forecasting corn and soybean yields in the United States | David M. Johnson | Corn and Soybean | USA state scale | MODIS | 250x250m | 2006–2011 | linear regression analysis (time series) | 2014 |
| 50 | Regression based Corn Yield Assessment using MODIS Based Daily NDVI in Iowa State | Ranjay Shrestha; Liping Di; Eugene G. Yu; Lingjun Kang; Lin Li; Md. Shahinoor Rahman; Meixia Deng; Zhengwei Yang | Corn | USA state scale | MODIS | 250x250m | 2000 - 2014 | linear regression analysis (time series) | 2016 |
| 51 | Drought Monitoring and Corn Yield Estimation in Southern Africa from AVHRR Data | Leonard S. Unganai and Felix N. Kogan | Corn | Southern Africa country scale | AVHRR | 1.1x1.1km | 1985-1994 | linear regression analysis (time series) | 1998 |
| 52 | Monitoring maize growth on the North China Plain using a hybrid genetic algorithm-based back-propagation neural network model | Lei Wang, Pengxin Wang, Shunlin Liang, Yongchao Zhu, Jahangir Khan, Shibo Fang | Maize | China province scale | MODIS | 250x250m | 2010-2018 | linear regression analysis (time series) | 2020 |
| 53 | Detection and estimation of mixed paddy rice cropping patterns with MODIS data | Dailiang Peng, Alfredo R. Huete, Jingfeng Huang, Fuming Wang, Huasheng Sun | Rice | China province scale | MODIS | 250x250m | 2000-2007 | linear regression analysis (time series) | 2011 |
| 54 | An analysis of cropland mask choice and ancillary data for annual corn yield forecasting using MODIS data | Yang Shao, James B. Campbell, Gregory N. Taff, Baojuan Zheng | Corn | USA state scale | MODIS | 250x250m | 2001-2012 | linear regression analysis (time series) | 2015 |
| 55 | Remote sensing phenological monitoring framework to characterize corn and soybean physiological growing stages | Chunyuan Diao | Corn and Soybean | USA province scale | MODIS | 250x250m | 2002-2017 | linear regression analysis (time series) | 2020 |
| 56 | A new space-borne perspective of crop productivity variations over the US Corn Belt | Peter Somkuti, Hartmut Bösch, Liang Feng, Paul I. Palmer, Robert J. Parker, Tristan Quaife | Corn | USA state scale | GOSAT | 1x1km | 2010–2016 | linear regression analysis (time series) | 2020 |
| 57 | Multi-year monitoring of rice crop phenology through time series analysis of MODIS images | M. Boschetti, D. Stroppiana, P. A. Brivio & S. Bocchi | Rice | Italian district scale | MODIS | 250x250m | 2001-2005 | linear regression analysis (time series) | 2009 |
| 58 | Wheat yield estimates using multi-temporal NDVI satellite imagery | M. P. Labus, G. A. Nielsen, R. L. Lawrence, R. Engel & D. S. Long | Wheat | USA province scale | AVHRR | 1.1x1.1km | 1989–1997 | linear regression analysis (time series) | 2002 |
| 59 | Spring Wheat Yield Estimation for Western Canada Using NOAA NDVI Data | K.P. Hochheim & D.G. Barber | Wheat | Canada province scale | AVHRR | 1.1x1.1km | 1987-1991 | linear regression analysis (time series) | 2014 |
| 60 | ON CORRELATION OF MAIZE AND WHEAT YIELD WITH NDVI: EXAMPLE OF HUNGARY | J. Mika, J. Kerenyi, A. Rimoczi-Paal, A. Merza, C. Szinell and I. Csiszar | Maize | Hungary province scale | AVHRR | 1.1x1.1km | 1985-1998 | linear regression analysis (time series) | 2002 |
| 61 | Assessment of the effectiveness of spatiotemporal fusion of multi-source satellite images for cotton yield estimation | Linghua Meng, Huanjun Liua, Xinle Zhang, Chunying Ren, Susan Ustin, Zhengchao Qiu, Mengyuan Xu, Dong Guo | Cotton | USA province scale | MODIS | 250x250m | 2002 | linear regression analysis (cross-sectional) | 2019 |
| 62 | MODIS-based corn grain yield estimation model incorporating crop phenology information | Toshihiro Sakamoto, Anatoly A. Gitelson, Timothy J. Arkebauer | Corn | USA state scale | MODIS | 250x250m | 2000-2011 | linear regression analysis (time series) | 2013 |
| 63 | Monitoring crop water content for corn and soybean fields through data fusion of MODIS and Landsat measurements in Iowa | Chenyang Xu, John J. Qu, Xianjun Hao, Michael H. Cosh, Zhiliang Zhu, Laurel Gutenberg | Corn | USA scale | Landsat | 30x30m | 2016 | linear regression analysis (cross-sectional) | 2020 |
| 64 | Spatiotemporal changes of surface solar radiation: Implication for air pollution and rice yield in East China | Yanyu Wang, Ze Meng, Rui Lyu, Guan Huang, Qianshan He, Tiantao Cheng | Rice | China province scale | MODIS | 250x250m | 2000-2016 | linear regression analysis (time series) | 2020 |

Supplementary Table S2. Skewness and kurtosis test result

|  | Observed | Bootstrap | | | Normal-based | |
| --- | --- | --- | --- | --- | --- | --- |
|  | coefficient | std. err. | z | P>z | [95% conf. interval] | |
| Skewness_e | 0.000 | 0.073 | 0.000 | 0.999 | -0.143 | 0.143 |
| Kurtosis_e | -0.504 | 0.204 | -2.470 | 0.014 | -0.904 | -0.103 |
| Skewness_u | -0.086 | 0.142 | -0.600 | 0.545 | -0.364 | 0.192 |
| Kurtosis_u | -0.090 | 0.216 | -0.420 | 0.676 | -0.513 | 0.333 |
| Note: One or more parameters could not be estimated in 11 bootstrap replicates;  standard-error estimates include only complete replications. | | | | | | |
| Joint test for Normality on e: chi2(2) = 6.08 Prob > chi2 = 0.0477 | | | | | | |
| Joint test for Normality on u: chi2(2) = 0.54 Prob > chi2 = 0.7630 | | | | | | |
|  | | | | | | |

Supplementary Figure S1. Hausman test result NDVI, MSAVI2, CIred-edge and NDRE indices (p<0.05)

| NDVI index | |
| --- | --- |
| 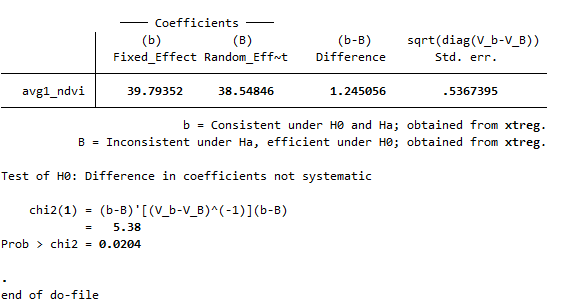 | 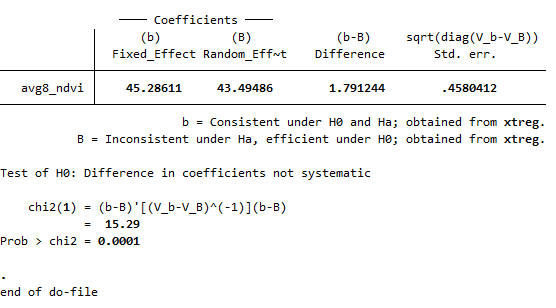 |
| 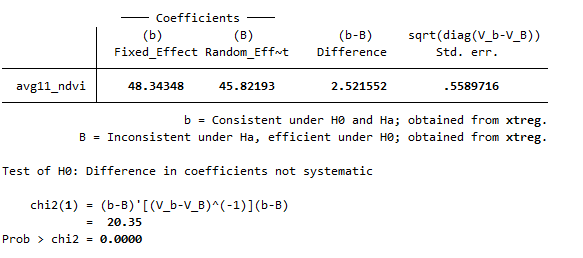 | 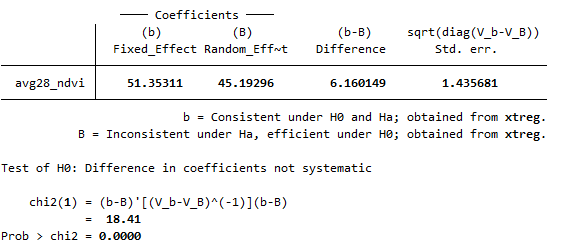 |
| 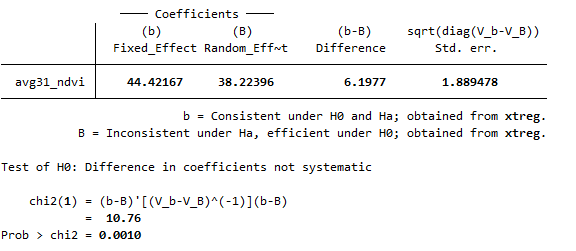 | 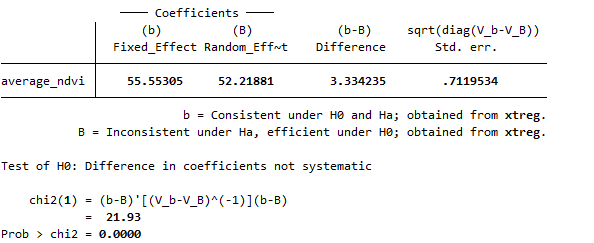 |
| CIred-edge Index | |
| 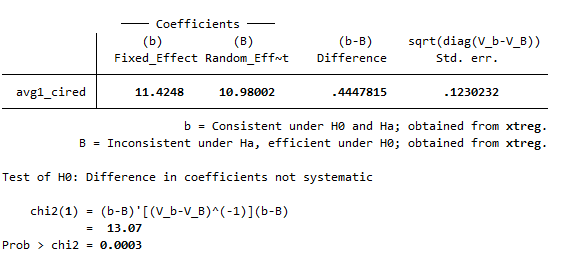 | 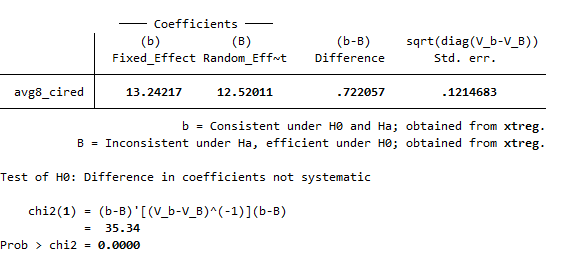 |
| 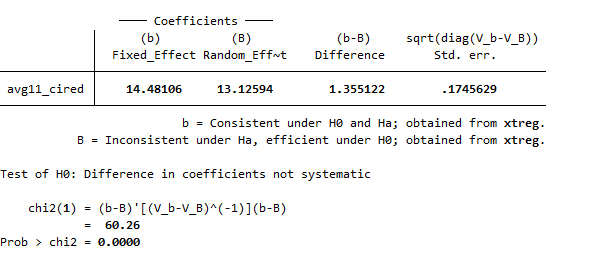 | 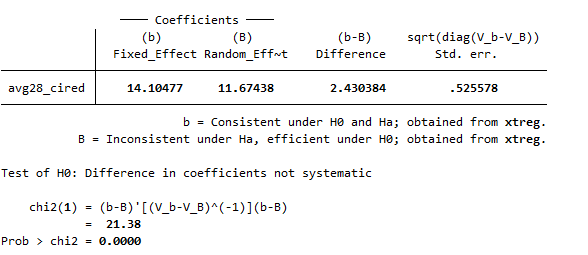 |
| 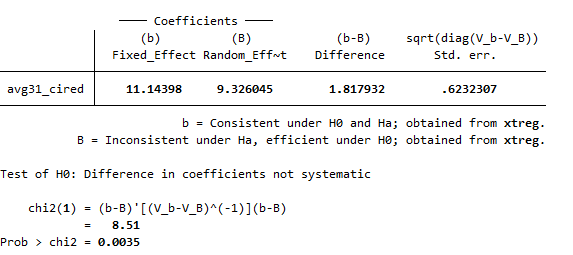 | 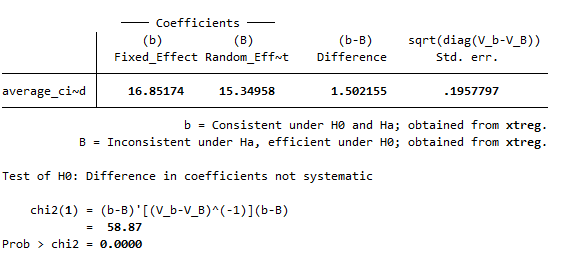 |
| MSAVI2 | |
| 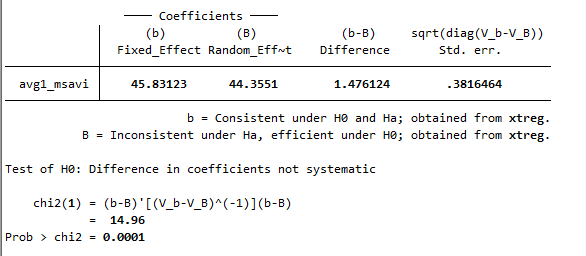 | 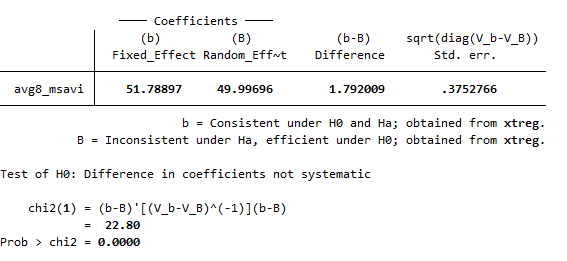 |
| 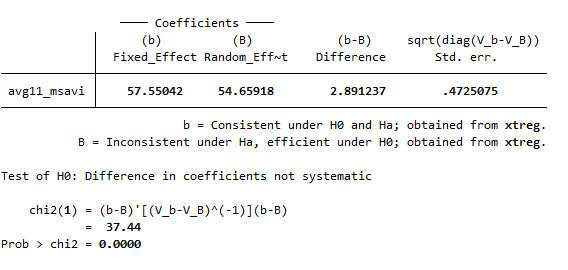 | 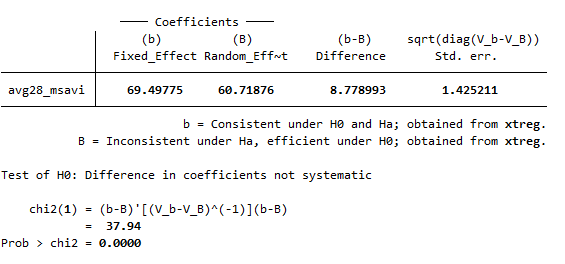 |
| 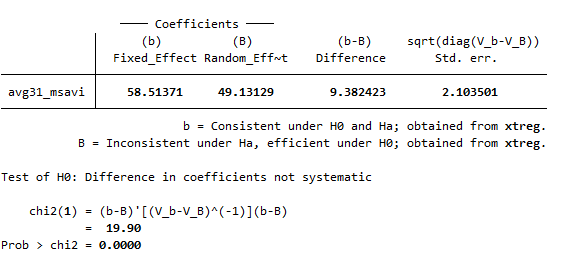 | 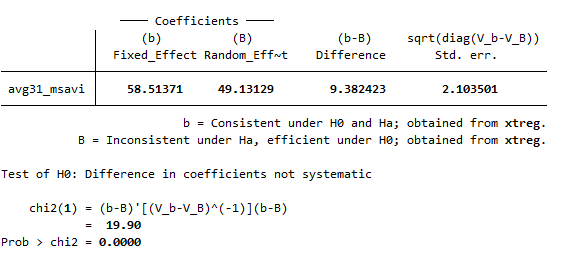 |
| NDRE index | |
| 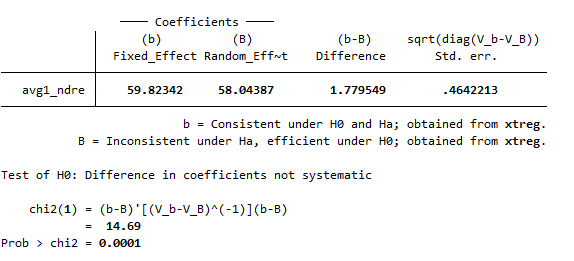 | 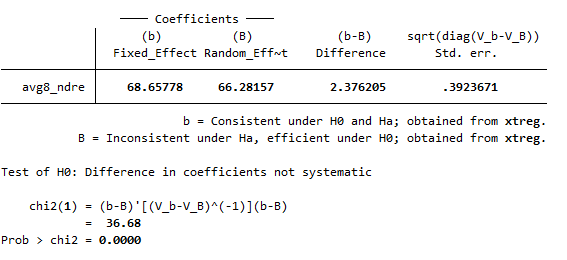 |
| 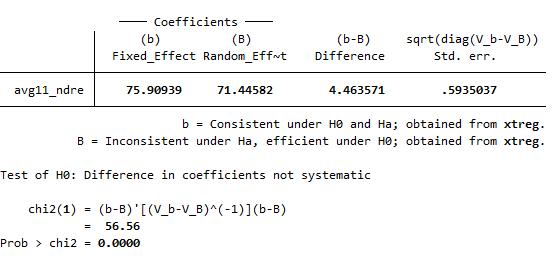 | 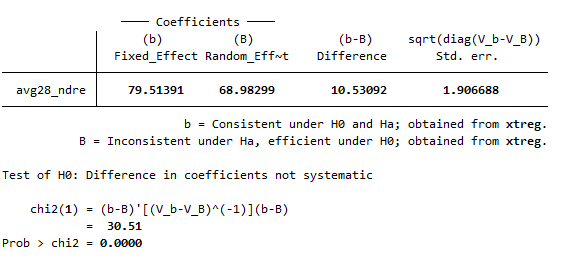 |
| 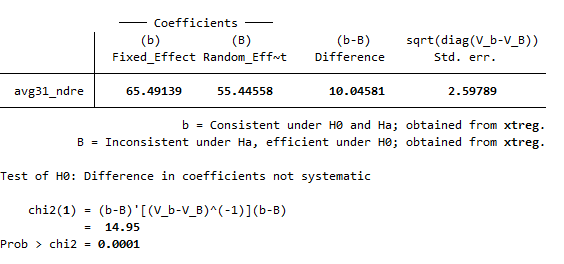 | 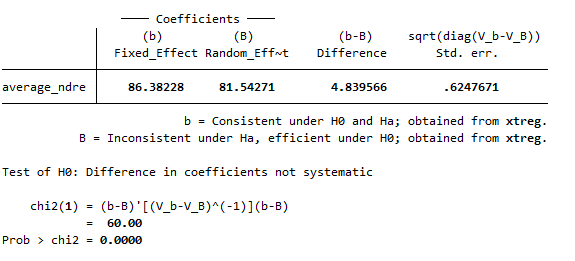 |

Supplementary Table S3. Wooldridge test result for autocorrelation in panel data

Linear regression Number of obs. = 464
 F (20, 231) = 33.60
 Prob > F = 0.00
 R-squared = 0.747
 Root MSE = 0.209
 (Std. err. adjusted for 232 clusters in fid)

| D.log_yield | Coefficient | Robust  std. err. | | t | P>t | [95% conf. interval] | |
| --- | --- | --- | --- | --- | --- | --- | --- |
| avg1_ndre | | |
| D1. | -0.715 | 0.617 | | -1.160 | 0.248 | -1.932 | 0.501 |
|  | | |
| avg8_ndre | | |
| D1. | 2.748 | 0.645 | | 4.260 | 0.000 | 1.478 | 4.018 |
|  | | |
| avg11_ndre | | |
| D1. | -0.026 | 0.900 | | -0.030 | 0.977 | -1.799 | 1.747 |
|  | | |
| avg28_ndre | | |
| D1. | 1.082 | 0.734 | | 1.470 | 0.142 | -0.364 | 2.529 |
|  | | |
| avg31_ndre | | |
| D1. | -1.019 | 0.812 | | -1.260 | 0.211 | -2.619 | 0.580 |
|  | | |
| avg1_msavi | | |
| D1. | 0.445 | 0.439 | | 1.010 | 0.311 | -0.419 | 1.309 |
|  | | |
| avg8_msavi | | |
| D1. | 0.197 | 0.586 | | 0.340 | 0.737 | -0.958 | 1.351 |
|  | | |
| avg11_msavi | | |
| D1. | 0.418 | 0.664 | | 0.630 | 0.529 | -0.889 | 1.726 |
|  | | |
| avg28_msavi | | |
| D1. | -0.556 | 0.513 | | -1.080 | 0.280 | -1.566 | 0.455 |
|  | | |
| avg31_msavi | | |
| D1. | 0.585 | 0.452 | | 1.290 | 0.197 | -0.305 | 1.476 |
|  | | |
| avg1_cired | | |
| D1. | 0.139 | 0.099 | | 1.410 | 0.159 | -0.055 | 0.333 |
|  | | |
| avg8_cired | | |
| D1. | 0.079 | 0.109 | | 0.730 | 0.466 | -0.135 | 0.293 |
|  | | |
| avg11_cired | | |
| D1. | -0.264 | 0.137 | | -1.930 | 0.055 | -0.534 | 0.006 |
|  | | |
| avg28_cired | | |
| D1. | 0.112 | 0.128 | | 0.870 | 0.383 | -0.141 | 0.365 |
|  | | |
| avg31_cired | | |
| D1. | 0.098 | 0.120 | | 0.820 | 0.415 | -0.138 | 0.333 |
|  | | |
| avg1_ndvi | | |
| D1. | -0.090 | 0.263 | | -0.340 | 0.733 | -0.608 | 0.428 |
|  | | |
| avg8_ndvi | | |
| D1. | 0.214 | 0.566 | | 0.380 | 0.705 | -0.901 | 1.329 |
|  | | |
| avg11_ndvi | | |
| D1. | 0.087 | 0.617 | | 0.140 | 0.889 | -1.129 | 1.302 |
|  | | |
| avg28_ndvi | | |
| D1. | -0.359 | 0.549 | | -0.650 | 0.513 | -1.440 | 0.722 |
|  | | |
| avg31_ndvi | | |
| D1. | -0.218 | 0.591 | | -0.370 | 0.712 | -1.383 | 0.947 |
|  | | | | | | | |

Wooldridge test for autocorrelation in panel data
H0: no first-order autocorrelation
 F (1, 231) = 3.017
 Prob > F = 0.0083

Supplementary Table S4. Panel fixed effect model results of R2, Adj R2 and RMSE between vegetation indices and ground yield data

| NDRE index | |
| --- | --- |
| | log_yield | Coef. | | St.Err. | t-value | | p-value | [95% Conf | | Interval] | Sig | | --- | --- | --- | --- | --- | --- | --- | --- | --- | --- | --- | | avg1_ndre | 3.048 | | 0.138 | 22.04 | | 0.000 | 2.776 | | 3.321 | *** | | Constant | 1.979 | | 0.05 | 39.41 | | 0.000 | 1.880 | | 2.078 | *** | |  | | | | | | | | | | | | Mean depend var | | 3.087 | | | SD dependent var | | | 0.351 | | | R-squared | | 0.677 | | | Number of obs | | | 696.000 | | | Adj R-squared | | 0.66 | | | Root MSE | | | 0.14 | | | F-test | | 485.936 | | | Prob > F | | | 0.000 | | | Akaike crit. (AIC) | | -798.509 | | | Bayesian crit. (BIC) | | | -793.964 | | |  | | | | | | | | | | | | **** p<0.01, ** p<0.05, * p<0.1* | | | | | | | | | | | | log_yield | Coef. | | St.Err. | t-value | | p-value | [95% Conf | | Interval] | | Sig | | --- | --- | --- | --- | --- | --- | --- | --- | --- | --- | --- | --- | | avg8_ndre | 3.514 | | .151 | 23.30 | | 0 | 3.217 | | 3.811 | | *** | | Constant | 1.793 | | .056 | 32.28 | | 0 | 1.683 | | 1.902 | | *** | |  | | | | | | | | | | | | | Mean depend var | | 3.087 | | | SD dependent var | | | 0.351 | | | R-squared | | 0.730 | | | Number of obs | | | 696.000 | | | Adj R-squared | | 0.72 | | | Root MSE | | | 0.12 | | | F-test | | 542.859 | | | Prob > F | | | . | | | Akaike crit. (AIC) | | | -920.34 | | Bayesian crit. (BIC) | | | -915.802 | | | **** p<.01, ** p<.05, * p<.1* | | | | | | | | | | | | |
| | log_yield | Coef. | | St.Err. | t-value | | p-value | [95% Conf | | Interval] | | Sig | | --- | --- | --- | --- | --- | --- | --- | --- | --- | --- | --- | --- | | avg11_ndre | 3.876 | | .181 | 21.38 | | 0 | 3.518 | | 4.233 | | *** | | Constant | 1.612 | | .069 | 23.37 | | 0 | 1.476 | | 1.748 | | *** | |  | | | | | | | | | | | | | Mean depend var | | 3.087 | | | SD dependent var | | | 0.351 | | | R-squared | | 0.680 | | | Number of obs | | | 696.000 | | | Adj R-squared | | 0.67 | | | Root MSE | | | 0.13 | | | F-test | | 457.022 | | | Prob > F | | | . | | | Akaike crit. (AIC) | | -802.096 | | | Bayesian crit. (BIC) | | | -797.550 | | | **** p<.01, ** p<.05, * p<.1* | | | | | | | | | | | | | | log_yield | Coef. | | St.Err. | t-value | | p-value | [95% Conf | | Interval] | | Sig | | --- | --- | --- | --- | --- | --- | --- | --- | --- | --- | --- | --- | | avg28_ndre | 4.012 | | .255 | 15.76 | | 0 | 3.511 | | 4.514 | | *** | | Constant | 1.573 | | .096 | 16.38 | | 0 | 1.384 | | 1.762 | | *** | |  | | | | | | | | | | | | | Mean depend var | | 3.087 | | | SD dependent var | | | 0.351 | | | R-squared | | 0.404 | | | Number of obs | | | 696.000 | | | Adj R-squared | | 0.39 | | | Root MSE | | | 0.19 | | | F-test | | 248.257 | | | Prob > F | | | . | | | Akaike crit. (AIC) | | -368.398 | | | Bayesian crit. (BIC) | | | -363.853 | | | **** p<.01, ** p<.05, * p<.1* | | | | | | | | | | | | |
| | log_yield | Coef. | | St.Err. | t-value | | p-value | [95% Conf | | Interval] | | Sig | | --- | --- | --- | --- | --- | --- | --- | --- | --- | --- | --- | --- | | avg31_ndre | 3.258 | | .285 | 11.45 | | 0 | 2.697 | | 3.819 | | *** | | Constant | 1.874 | | .106 | 17.68 | | 0 | 1.665 | | 2.082 | | *** | |  | | | | | | | | | | | | | Mean dependent var | | 3.087 | | | SD dependent var | | | 0.351 | | | R-squared | | 0.245 | | | Number of obs | | | 696.000 | | | Adj R-squared | | 0.23 | | | Root MSE | | | 0.21 | | | F-test | | 131.036 | | | Prob > F | | | . | | | Akaike crit. (AIC) | | -203.595 | | | Bayesian crit. (BIC) | | | -199.050 | | | **** p<.01, ** p<.05, * p<.1* | | | | | | | | | | | | | | log_yield | Coef. | | St.Err. | t-value | | p-value | [95% Conf | | Interval] | | Sig | | --- | --- | --- | --- | --- | --- | --- | --- | --- | --- | --- | --- | | average_ndre | 4.393 | | .211 | 20.78 | | 0 | 3.977 | | 4.81 | | *** | | Constant | 1.451 | | .079 | 18.44 | | 0 | 1.296 | | 1.606 | | *** | |  | | | | | | | | | | | | | Mean dependent var | | 3.087 | | | SD dependent var | | | 0.351 | | | R-squared | | 0.687 | | | Number of obs | | | 696.000 | | | Adj R-squared | | 0.67 | | | Root MSE | | | 0.13 | | | F-test | | 431.994 | | | Prob > F | | | . | | | Akaike crit. (AIC) | | -816.754 | | | Bayesian crit. (BIC) | | | -812.209 | | | **** p<.01, ** p<.05, * p<.1* | | | | | | | | | | | | |  | | | | | | | | | | | | |
| NDVI index | |
| | log_yield | Coef. | | St.Err. | t-value | | p-value | [95% Conf | | Interval] | | Sig | | --- | --- | --- | --- | --- | --- | --- | --- | --- | --- | --- | --- | | avg1_ndvi | 2.06 | | .115 | 17.88 | | 0 | 1.833 | | 2.287 | | *** | | Constant | 2.056 | | .058 | 35.68 | | 0 | 1.943 | | 2.17 | | *** | |  | | | | | | | | | | | | | Mean dependent var | | 3.087 | | | SD dependent var | | | 0.351 | | | R-squared | | 0.542 | | | Number of obs | | | 696.000 | | | Adj R-squared | | 053 | | | Root MSE | | | 0.16 | | | F-test | | 319.517 | | | Prob > F | | | . | | | Akaike crit. (AIC) | | -552.205 | | | Bayesian crit. (BIC) | | | -547.660 | | | **** p<.01, ** p<.05, * p<.1* | | | | | | | | | | | | | | log_yield | Coef. | | St.Err. | t-value | | p-value | [95% Conf | | Interval] | | Sig | | --- | --- | --- | --- | --- | --- | --- | --- | --- | --- | --- | --- | | avg8_ndvi | 2.337 | | .119 | 19.64 | | 0 | 2.103 | | 2.572 | | *** | | Constant | 1.913 | | .06 | 32.02 | | 0 | 1.796 | | 2.031 | | *** | |  | | | | | | | | | | | | | Mean dependent var | | 3.087 | | | SD dependent var | | | 0.351 | | | R-squared | | 0.610 | | | Number of obs | | | 696.000 | | | Adj R-squared | | 0.60 | | | Root MSE | | | 0.15 | | | F-test | | 385.590 | | | Prob > F | | | . | | | Akaike crit. (AIC) | | -663.242 | | | Bayesian crit. (BIC) | | | -658.696 | | | **** p<.01, ** p<.05, * p<.1* | | | | | | | | | | | | |
| | log_yield | Coef. | | St.Err. | t-value | | p-value | [95% Conf | | Interval] | | Sig | | --- | --- | --- | --- | --- | --- | --- | --- | --- | --- | --- | --- | | avg11_ndvi | 2.48 | | .136 | 18.23 | | 0 | 2.212 | | 2.748 | | *** | | Constant | 1.805 | | .07 | 25.69 | | 0 | 1.667 | | 1.944 | | *** | |  | | | | | | | | | | | | | Mean dependent var | | 3.087 | | | SD dependent var | | | 0.351 | | | R-squared | | 0.578 | | | Number of obs | | | 696.000 | | | Adj R-squared | | 0.56 | | | Root MSE | | | 0.16 | | | F-test | | 332.227 | | | Prob > F | | | . | | | Akaike crit. (AIC) | | -608.446 | | | Bayesian crit. (BIC) | | | -603.900 | | | **** p<.01, ** p<.05, * p<.1* | | | | | | | | | | | | | | log_yield | Coef. | | St.Err. | t-value | | p-value | [95% Conf | | Interval] | | Sig | | --- | --- | --- | --- | --- | --- | --- | --- | --- | --- | --- | --- | | avg28_ndvi | 2.613 | | .245 | 10.66 | | 0 | 2.13 | | 3.096 | | *** | | Constant | 1.714 | | .129 | 13.31 | | 0 | 1.461 | | 1.968 | | *** | |  | | | | | | | | | | | | | Mean dependent var | | 3.087 | | | SD dependent var | | | 0.351 | | | R-squared | | 0.343 | | | Number of obs | | | 696.000 | | | Adj R-squared | | 0.33 | | | Root MSE | | | 0.19 | | | F-test | | 113.575 | | | Prob > F | | | . | | | Akaike crit. (AIC) | | -300.679 | | | Bayesian crit. (BIC) | | | -296.133 | | | **** p<.01, ** p<.05, * p<.1* | | | | | | | | | | | | |
| | log_yield | Coef. | | St.Err. | t-value | | p-value | [95% Conf | | Interval] | | Sig | | --- | --- | --- | --- | --- | --- | --- | --- | --- | --- | --- | --- | | avg31_ndvi | 2.222 | | .264 | 8.43 | | 0 | 1.703 | | 2.742 | | *** | | Constant | 1.943 | | .136 | 14.33 | | 0 | 1.676 | | 2.21 | | *** | |  | | | | | | | | | | | | | Mean dependent var | | 3.087 | | | SD dependent var | | | 0.351 | | | R-squared | | 0.213 | | | Number of obs | | | 696.000 | | | Adj R-squared | | 0.20 | | | Root MSE | | | 0.21 | | | F-test | | 71.097 | | | Prob > F | | | . | | | Akaike crit. (AIC) | | -174.391 | | | Bayesian crit. (BIC) | | | -169.845 | | | **** p<.01, ** p<.05, * p<.1* | | | | | | | | | | | | |  | | | | | | | | | | | | | | log_yield | Coef. | | St.Err. | t-value | | p-value | [95% Conf | | Interval] | | Sig | | --- | --- | --- | --- | --- | --- | --- | --- | --- | --- | --- | --- | | average_ndvi | 2.851 | | .175 | 16.25 | | 0 | 2.505 | | 3.197 | | *** | | Constant | 1.628 | | .09 | 18.13 | | 0 | 1.451 | | 1.805 | | *** | |  | | | | | | | | | | | | | Mean dependent var | | 3.087 | | | SD dependent var | | | 0.351 | | | R-squared | | 0.561 | | | Number of obs | | | 696.000 | | | Adj R-squared | | 0.55 | | | Root MSE | | | 0.16 | | | F-test | | 264.062 | | | Prob > F | | | . | | | Akaike crit. (AIC) | | -581.531 | | | Bayesian crit. (BIC) | | | -576.986 | | | **** p<.01, ** p<.05, * p<.1* | | | | | | | | | | | | |  | | | | | | | | | | | | |
| MSAVI2 | |
| | log_yield | Coef. | | St.Err. | t-value | | p-value | [95% Conf | | Interval] | | Sig | | --- | --- | --- | --- | --- | --- | --- | --- | --- | --- | --- | --- | | avg1_msavi | 2.372 | | .115 | 20.70 | | 0 | 2.147 | | 2.598 | | *** | | Constant | 1.569 | | .073 | 21.39 | | 0 | 1.424 | | 1.713 | | *** | |  | | | | | | | | | | | | | Mean dependent var | | 3.087 | | | SD dependent var | | | 0.351 | | | R-squared | | 0.665 | | | Number of obs | | | 696.000 | | | Adj R-squared | | 0.65 | | | Root MSE | | | 0.14 | | | F-test | | 428.628 | | | Prob > F | | | . | | | Akaike crit. (AIC) | | -770.148 | | | Bayesian crit. (BIC) | | | -765.603 | | | **** p<.01, ** p<.05, * p<.1* | | | | | | | | | | | | |  | | | | | | | | | | | | | | log_yield | Coef. | | St.Err. | t-value | | p-value | [95% Conf | | Interval] | | Sig | | --- | --- | --- | --- | --- | --- | --- | --- | --- | --- | --- | --- | | avg8_msavi | 2.682 | | .12 | 22.31 | | 0 | 2.445 | | 2.918 | | *** | | Constant | 1.349 | | .078 | 17.33 | | 0 | 1.196 | | 1.503 | | *** | |  | | | | | | | | | | | | | Mean dependent var | | 3.087 | | | SD dependent var | | | 0.351 | | | R-squared | | 0.693 | | | Number of obs | | | 696.000 | | | Adj R-squared | | 0.68 | | | Root MSE | | | 0.13 | | | F-test | | 497.520 | | | Prob > F | | | . | | | Akaike crit. (AIC) | | -830.663 | | | Bayesian crit. (BIC) | | | -826.117 | | | **** p<.01, ** p<.05, * p<.1* | | | | | | | | | | | | |  | | | | | | | | | | | | |
| | log_yield | Coef. | | St.Err. | t-value | | p-value | [95% Conf | | Interval] | | Sig | | --- | --- | --- | --- | --- | --- | --- | --- | --- | --- | --- | --- | | avg11_msavi | 2.968 | | .139 | 21.35 | | 0 | 2.694 | | 3.242 | | *** | | Constant | 1.118 | | .092 | 12.13 | | 0 | .937 | | 1.3 | | *** | |  | | | | | | | | | | | | | Mean dependent var | | 3.087 | | | SD dependent var | | | 0.351 | | | R-squared | | 0.668 | | | Number of obs | | | 696.000 | | | Adj R-squared | | 0.65 | | | Root MSE | | | 0.14 | | | F-test | | 455.924 | | | Prob > F | | | . | | | Akaike crit. (AIC) | | -775.584 | | | Bayesian crit. (BIC) | | | -771.038 | | | **** p<.01, ** p<.05, * p<.1* | | | | | | | | | | | | |  | | | | | | | | | | | | | | log_yield | Coef. | | St.Err. | t-value | | p-value | [95% Conf | | Interval] | | Sig | | --- | --- | --- | --- | --- | --- | --- | --- | --- | --- | --- | --- | | avg28_msavi | 3.557 | | .217 | 16.42 | | 0 | 3.131 | | 3.984 | | *** | | Constant | .685 | | .146 | 4.68 | | 0 | .396 | | .973 | | *** | |  | | | | | | | | | | | | | Mean dependent var | | 3.087 | | | SD dependent var | | | 0.351 | | | R-squared | | 0.464 | | | Number of obs | | | 696.000 | | | Adj R-squared | | 0.45 | | | Root MSE | | | 0.18 | | | F-test | | 269.493 | | | Prob > F | | | . | | | Akaike crit. (AIC) | | -441.854 | | | Bayesian crit. (BIC) | | | -437.308 | | | **** p<.01, ** p<.05, * p<.1* | | | | | | | | | | | | |  | | | | | | | | | | | | |
| | log_yield | Coef. | | St.Err. | t-value | | p-value | [95% Conf | | Interval] | | Sig | | --- | --- | --- | --- | --- | --- | --- | --- | --- | --- | --- | --- | | avg31_msavi | 2.963 | | .248 | 11.93 | | 0 | 2.474 | | 3.453 | | *** | | Constant | 1.113 | | .165 | 6.73 | | 0 | .787 | | 1.439 | | *** | |  | | | | | | | | | | | | | Mean dependent var | | 3.087 | | | SD dependent var | | | 0.351 | | | R-squared | | 0.285 | | | Number of obs | | | 696.000 | | | Adj R-squared | | 0.27 | | | Root MSE | | | 0.20 | | | F-test | | 142.232 | | | Prob > F | | | . | | | Akaike crit. (AIC) | | -241.73 | | | Bayesian crit. (BIC) | | | -237.192 | | | **** p<.01, ** p<.05, * p<.1* | | | | | | | | | | | | |  | | | | | | | | | | | | | | log_yield | Coef. | | St.Err. | t-value | | p-value | [95% Conf | Interval] | | Sig | | --- | --- | --- | --- | --- | --- | --- | --- | --- | --- | --- | | average_msavi | 3.445 | | .16 | 21.56 | | 0 | 3.13 | 3.76 | | *** | | Constant | .818 | | .105 | 7.77 | | 0 | .611 | 1.026 | | *** | |  | | | | | | | | | | | | Mean dependent var | | 3.087 | | | SD dependent var | | | 0.351 | | R-squared | | 0.683 | | | Number of obs | | | 696.000 | | Adj R-squared | | 0.67 | | | Root MSE | | | 0.14 | | F-test | | 464.657 | | | Prob > F | | | . | | Akaike crit. (AIC) | | -807.018 | | | Bayesian crit. (BIC) | | | -802.47 | | **** p<.01, ** p<.05, * p<.1* | | | | | | | | | | | |  | | | | | | | | | | | |
| CIred-edge Index | |
| | log_yield | Coef. | | St.Err. | t-value | | p-value | [95% Conf | | Interval] | | Sig | | --- | --- | --- | --- | --- | --- | --- | --- | --- | --- | --- | --- | | avg1_cired | .576 | | .033 | 17.48 | | 0 | .511 | | .64 | | *** | | Constant | 2.305 | | .045 | 51.50 | | 0 | 2.217 | | 2.393 | | *** | |  | | | | | | | | | | | | | Mean dependent var | | 3.087 | | | SD dependent var | | | 0.351 | | | R-squared | | 0.609 | | | Number of obs | | | 696.000 | | | Adj R-squared | | 0.59 | | | Root MSE | | | 0.15 | | | F-test | | 305.391 | | | Prob > F | | | . | | | Akaike crit. (AIC) | | -660.992 | | | Bayesian crit. (BIC) | | | -656.446 | | | **** p<.01, ** p<.05, * p<.1* | | | | | | | | | | | | | | log_yield | Coef. | | St.Err. | t-value | | p-value | [95% Conf | | Interval] | | Sig | | --- | --- | --- | --- | --- | --- | --- | --- | --- | --- | --- | --- | | avg8_cired | .672 | | .037 | 18.01 | | 0 | .599 | | .746 | | *** | | Constant | 2.163 | | .051 | 42.17 | | 0 | 2.062 | | 2.264 | | *** | |  | | | | | | | | | | | | | Mean dependent var | | 3.087 | | | SD dependent var | | | 0.351 | | | R-squared | | 0.650 | | | Number of obs | | | 696.000 | | | Adj R-squared | | 0.64 | | | Root MSE | | | 0.14 | | | F-test | | 324.511 | | | Prob > F | | | . | | | Akaike crit. (AIC) | | -739.572 | | | Bayesian crit. (BIC) | | | -735.026 | | | **** p<.01, ** p<.05, * p<.1* | | | | | | | | | | | | |
| | log_yield | Coef. | | St.Err. | t-value | | p-value | [95% Conf | | Interval] | | Sig | | --- | --- | --- | --- | --- | --- | --- | --- | --- | --- | --- | --- | | avg11_cired | .735 | | .042 | 17.64 | | 0 | .653 | | .817 | | *** | | Constant | 2.026 | | .06 | 33.70 | | 0 | 1.908 | | 2.145 | | *** | |  | | | | | | | | | | | | | Mean dependent var | | 3.087 | | | SD dependent var | | | 0.351 | | | R-squared | | 0.613 | | | Number of obs | | | 696.000 | | | Adj R-squared | | 0.60 | | | Root MSE | | | 0.15 | | | F-test | | 311.281 | | | Prob > F | | | . | | | Akaike crit. (AIC) | | -667.893 | | | Bayesian crit. (BIC) | | | -663.348 | | | **** p<.01, ** p<.05, * p<.1* | | | | | | | | | | | | |  | | | | | | | | | | | | | | log_yield | Coef. | | St.Err. | t-value | | p-value | [95% Conf | | Interval] | | Sig | | --- | --- | --- | --- | --- | --- | --- | --- | --- | --- | --- | --- | | avg28_cired | .726 | | .06 | 12.14 | | 0 | .608 | | .844 | | *** | | Constant | 2.107 | | .081 | 26.11 | | 0 | 1.948 | | 2.266 | | *** | |  | | | | | | | | | | | | | Mean dependent var | | 3.087 | | | SD dependent var | | | 0.351 | | | R-squared | | 0.309 | | | Number of obs | | | 696.000 | | | Adj R-squared | | 0.29 | | | Root MSE | | | 0.20 | | | F-test | | 147.486 | | | Prob > F | | | . | | | Akaike crit. (AIC) | | -265.030 | | | Bayesian crit. (BIC) | | | -260.485 | | | **** p<.01, ** p<.05, * p<.1* | | | | | | | | | | | | |  | | | | | | | | | | | | |
| | log_yield | Coef. | | St.Err. | t-value | | p-value | [95% Conf | | Interval] | | Sig | | --- | --- | --- | --- | --- | --- | --- | --- | --- | --- | --- | --- | | avg31_cired | .564 | | .064 | 8.81 | | 0 | .437 | | .69 | | *** | | Constant | 2.348 | | .084 | 27.98 | | 0 | 2.182 | | 2.513 | | *** | |  | | | | | | | | | | | | | Mean dependent var | | 3.087 | | | SD dependent var | | | 0.351 | | | R-squared | | 0.177 | | | Number of obs | | | 696.000 | | | Adj R-squared | | 0.16 | | | Root MSE | | | 0.22 | | | F-test | | 77.598 | | | Prob > F | | | . | | | Akaike crit. (AIC) | | -143.841 | | | Bayesian crit. (BIC) | | | -139.295 | | | **** p<.01, ** p<.05, * p<.1* | | | | | | | | | | | | |  | | | | | | | | | | | | | | log_yield | Coef. | | St.Err. | t-value | | p-value | [95% Conf | | Interval] | | Sig | | --- | --- | --- | --- | --- | --- | --- | --- | --- | --- | --- | --- | | average_cired | .855 | | .052 | 16.32 | | 0 | .751 | | .958 | | *** | | Constant | 1.918 | | .072 | 26.78 | | 0 | 1.777 | | 2.059 | | *** | |  | | | | | | | | | | | | | Mean dependent var | | 3.087 | | | SD dependent var | | | 0.351 | | | R-squared | | 0.615 | | | Number of obs | | | 696.000 | | | Adj R-squared | | 0.60 | | | Root MSE | | | 0.15 | | | F-test | | 266.336 | | | Prob > F | | | . | | | Akaike crit. (AIC) | | -672.449 | | | Bayesian crit. (BIC) | | | -667.903 | | | **** p<.01, ** p<.05, * p<.1* | | | | | | | | | | | | |  | | | | | | | | | | | | |

Supplementary Table S5. Prais–Winsten model results of R2, Adj R2 and RMSE between vegetation indices and ground yield data

| NDRE index | |
| --- | --- |
| | log_yield | Coef. | | St.Err. | t-value | | p-value | [95% Conf | | Interval] | | Sig | | --- | --- | --- | --- | --- | --- | --- | --- | --- | --- | --- | --- | | avg1_ndre | 2.637 | | .256 | 10.30 | | 0 | 2.135 | | 3.139 | | *** | | Constant | 2.105 | | .107 | 19.62 | | 0 | 1.894 | | 2.315 | | *** | |  | | | | | | | | | | | | | Mean dependent var | | 3.087 | | | SD dependent var | | | 0.351 | | | R-squared | | 0.95 | | | Number of obs | | | 696.000 | | | Adj R-squared | | 0.94 | | | Root MSE | | | 0.22 | | | Chi-square | | 106.050 | | | Prob > chi2 | | | 0.000 | | | **** p<.01, ** p<.05, * p<.1* | | | | | | | | | | | | |  | | | | | | | | | | | | | | log_yield | Coef. | | St.Err. | t-value | | p-value | [95% Conf | | Interval] | | Sig | | --- | --- | --- | --- | --- | --- | --- | --- | --- | --- | --- | --- | | avg8_ndre | 2.969 | | .279 | 10.63 | | 0 | 2.421 | | 3.516 | | *** | | Constant | 1.969 | | .114 | 17.32 | | 0 | 1.746 | | 2.191 | | *** | |  | | | | | | | | | | | | | Mean dependent var | | 3.087 | | | SD dependent var | | | 0.351 | | | R-squared | | 0.96 | | | Number of obs | | | 696.000 | | | Adj R-squared | | 0.95 | | | Root MSE | | | 0.21 | | | Chi-square | | 112.977 | | | Prob > chi2 | | | 0.000 | | | **** p<.01, ** p<.05, * p<.1* | | | | | | | | | | | | |  | | | | | | | | | | | | |
| | log_yield | Coef. | | St.Err. | t-value | | p-value | [95% Conf | | Interval] | | Sig | | --- | --- | --- | --- | --- | --- | --- | --- | --- | --- | --- | --- | | avg11_ndre | 3.033 | | .382 | 7.93 | | 0 | 2.284 | | 3.782 | | *** | | Constant | 1.901 | | .156 | 12.17 | | 0 | 1.595 | | 2.208 | | *** | |  | | | | | | | | | | | | | Mean dependent var | | 3.087 | | | SD dependent var | | | 0.351 | | | R-squared | | 0.95 | | | Number of obs | | | 696.000 | | | Adj R-squared | | 0.94 | | | Root MSE | | | 0.23 | | | Chi-square | | 62.953 | | | Prob > chi2 | | | 0.000 | | | **** p<.01, ** p<.05, * p<.1* | | | | | | | | | | | | |  | | | | | | | | | | | | | | log_yield | Coef. | | St.Err. | t-value | | p-value | [95% Conf | | Interval] | | Sig | | --- | --- | --- | --- | --- | --- | --- | --- | --- | --- | --- | --- | | avg28_ndre | 2.816 | | .545 | 5.17 | | 0 | 1.748 | | 3.884 | | *** | | Constant | 1.98 | | .214 | 9.25 | | 0 | 1.56 | | 2.4 | | *** | |  | | | | | | | | | | | | | Mean dependent var | | 3.087 | | | SD dependent var | | | 0.351 | | | R-squared | | 0.93 | | | Number of obs | | | 696.000 | | | Adj R-squared | | 0.92 | | | Root MSE | | | 0.26 | | | Chi-square | | 26.723 | | | Prob > chi2 | | | 0.000 | | | **** p<.01, ** p<.05, * p<.1* | | | | | | | | | | | | |  | | | | | | | | | | | | |
| | log_yield | Coef. | | St.Err. | t-value | | p-value | [95% Conf | | Interval] | | Sig | | --- | --- | --- | --- | --- | --- | --- | --- | --- | --- | --- | --- | | avg31_ndre | 2.242 | | .557 | 4.03 | | 0 | 1.151 | | 3.333 | | *** | | Constant | 2.206 | | .209 | 10.55 | | 0 | 1.796 | | 2.615 | | *** | |  | | | | | | | | | | | | | Mean dependent var | | 3.087 | | | SD dependent var | | | 0.351 | | | R-squared | | 0.92 | | | Number of obs | | | 696.000 | | | Adj R-squared | | 0.91 | | | Root MSE | | | 0.28 | | | Chi-square | | 16.220 | | | Prob > chi2 | | | 0.000 | | | **** p<.01, ** p<.05, * p<.1* | | | | | | | | | | | | |  | | | | | | | | | | | | | | log_yield | Coef. | | St.Err. | t-value | | p-value | [95% Conf | | Interval] | | Sig | | --- | --- | --- | --- | --- | --- | --- | --- | --- | --- | --- | --- | | average_ndre | 3.47 | | .421 | 8.24 | | 0 | 2.644 | | 4.296 | | *** | | Constant | 1.767 | | .167 | 10.58 | | 0 | 1.439 | | 2.094 | | *** | |  | | | | | | | | | | | | | Mean dependent var | | 3.087 | | | SD dependent var | | | 0.351 | | | R-squared | | 0.94 | | | Number of obs | | | 696.000 | | | Adj R-squared | |  | | | Root MSE | | | 0.23 | | | Chi-square | | 67.845 | | | Prob > chi2 | | | 0.000 | | | **** p<.01, ** p<.05, * p<.1* | | | | | | | | | | | | |  | | | | | | | | | | | | |
| NDVI index | |
| | log_yield | Coef. | | St.Err. | t-value | | p-value | [95% Conf | | Interval] | | Sig | | --- | --- | --- | --- | --- | --- | --- | --- | --- | --- | --- | --- | | avg1_ndvi | 1.799 | | .251 | 7.16 | | 0 | 1.306 | | 2.291 | | *** | | Constant | 2.157 | | .133 | 16.23 | | 0 | 1.896 | | 2.417 | | *** | |  | | | | | | | | | | | | | Mean dependent var | | 3.087 | | | SD dependent var | | | 0.351 | | | R-squared | | 0.95 | | | Number of obs | | | 696.000 | | | Adj R-squared | | 0.94 | | | Root MSE | | | 0.24 | | | Chi-square | | 51.197 | | | Prob > chi2 | | | 0.000 | | | **** p<.01, ** p<.05, * p<.1* | | | | | | | | | | | | |  | | | | | | | | | | | | | | log_yield | Coef. | | St.Err. | t-value | | p-value | [95% Conf | | Interval] | | Sig | | --- | --- | --- | --- | --- | --- | --- | --- | --- | --- | --- | --- | | avg8_ndvi | 1.965 | | .303 | 6.48 | | 0 | 1.371 | | 2.559 | | *** | | Constant | 2.068 | | .157 | 13.20 | | 0 | 1.761 | | 2.375 | | *** | |  | | | | | | | | | | | | | Mean dependent var | | 3.087 | | | SD dependent var | | | 0.351 | | | R-squared | | 0.95 | | | Number of obs | | | 696.000 | | | Adj R-squared | |  | | | Root MSE | | | 0.23 | | | Chi-square | | 42.040 | | | Prob > chi2 | | | 0.000 | | | **** p<.01, ** p<.05, * p<.1* | | | | | | | | | | | | |  | | | | | | | | | | | | |
| | log_yield | Coef. | | St.Err. | t-value | | p-value | [95% Conf | | Interval] | | Sig | | --- | --- | --- | --- | --- | --- | --- | --- | --- | --- | --- | --- | | avg11_ndvi | 2.011 | | .345 | 5.82 | | 0 | 1.334 | | 2.688 | | *** | | Constant | 2.016 | | .184 | 10.94 | | 0 | 1.654 | | 2.377 | | *** | |  | | | | | | | | | | | | | Mean dependent var | | 3.087 | | | SD dependent var | | | 0.351 | | | R-squared | | 0.94 | | | Number of obs | | | 696.000 | | | Adj R-squared | | 0.93 | | | Root MSE | | | 0.24 | | | Chi-square | | 33.887 | | | Prob > chi2 | | | 0.000 | | | **** p<.01, ** p<.05, * p<.1* | | | | | | | | | | | | |  | | | | | | | | | | | | | | log_yield | Coef. | | St.Err. | t-value | | p-value | [95% Conf | | Interval] | | Sig | | --- | --- | --- | --- | --- | --- | --- | --- | --- | --- | --- | --- | | avg28_ndvi | 1.892 | | .479 | 3.95 | | 0 | .954 | | 2.83 | | *** | | Constant | 2.051 | | .262 | 7.83 | | 0 | 1.537 | | 2.564 | | *** | |  | | | | | | | | | | | | | Mean dependent var | | 3.087 | | | SD dependent var | | | 0.351 | | | R-squared | | 0.93 | | | Number of obs | | | 696.000 | | | Adj R-squared | | 0.92 | | | Root MSE | | | 0.27 | | | Chi-square | | 15.620 | | | Prob > chi2 | | | 0.000 | | | **** p<.01, ** p<.05, * p<.1* | | | | | | | | | | | | |  | | | | | | | | | | | | |
| | log_yield | Coef. | | St.Err. | t-value | | p-value | [95% Conf | | Interval] | | Sig | | --- | --- | --- | --- | --- | --- | --- | --- | --- | --- | --- | --- | | avg31_ndvi | 1.587 | | .479 | 3.31 | | .001 | .648 | | 2.526 | | *** | | Constant | 2.226 | | .257 | 8.66 | | 0 | 1.722 | | 2.73 | | *** | |  | | | | | | | | | | | | | Mean dependent var | | 3.087 | | | SD dependent var | | | 0.351 | | | R-squared | | 0.92 | | | Number of obs | | | 696.000 | | | Adj R-squared | | 0.91 | | | Root MSE | | | 0.28 | | | Chi-square | | 10.981 | | | Prob > chi2 | | | 0.001 | | | **** p<.01, ** p<.05, * p<.1* | | | | | | | | | | | | |  | | | | | | | | | | | | | | log_yield | Coef. | | St.Err. | t-value | | p-value | [95% Conf | | Interval] | | Sig | | --- | --- | --- | --- | --- | --- | --- | --- | --- | --- | --- | --- | | average_ndvi | 2.258 | | .407 | 5.55 | | 0 | 1.461 | | 3.055 | | *** | | Constant | 1.898 | | .213 | 8.91 | | 0 | 1.481 | | 2.316 | | *** | |  | | | | | | | | | | | | | Mean dependent var | | 3.087 | | | SD dependent var | | | 0.351 | | | R-squared | | 0.94 | | | Number of obs | | | 696.000 | | | Adj R-squared | |  | | | Root MSE | | | 0.24 | | | Chi-square | | 30.822 | | | Prob > chi2 | | | 0.000 | | | **** p<.01, ** p<.05, * p<.1* | | | | | | | | | | | | |  | | | | | | | | | | | | |
| MSAVI2 | |
| | log_yield | Coef. | | St.Err. | t-value | | p-value | [95% Conf | | Interval] | | Sig | | --- | --- | --- | --- | --- | --- | --- | --- | --- | --- | --- | --- | | avg1_msavi | 2.037 | | .239 | 8.54 | | 0 | 1.569 | | 2.504 | | *** | | Constant | 1.752 | | .157 | 11.15 | | 0 | 1.444 | | 2.06 | | *** | |  | | | | | | | | | | | | | Mean dependent var | | 3.087 | | | SD dependent var | | | 0.351 | | | R-squared | | 0.95 | | | Number of obs | | | 696.000 | | | Adj R-squared | | 0.94 | | | Root MSE | | | 0.23 | | | Chi-square | | 72.907 | | | Prob > chi2 | | | 0.000 | | | **** p<.01, ** p<.05, * p<.1* | | | | | | | | | | | | |  | | | | | | | | | | | | | | log_yield | Coef. | | St.Err. | t-value | | p-value | [95% Conf | | Interval] | | Sig | | --- | --- | --- | --- | --- | --- | --- | --- | --- | --- | --- | --- | | avg8_msavi | 2.275 | | .262 | 8.67 | | 0 | 1.76 | | 2.789 | | *** | | Constant | 1.582 | | .172 | 9.20 | | 0 | 1.245 | | 1.919 | | *** | |  | | | | | | | | | | | | | Mean dependent var | | 3.087 | | | SD dependent var | | | 0.351 | | | R-squared | | 0.95 | | | Number of obs | | | 696.000 | | | Adj R-squared | | 0.94 | | | Root MSE | | | 0.22 | | | Chi-square | | 75.131 | | | Prob > chi2 | | | 0.000 | | | **** p<.01, ** p<.05, * p<.1* | | | | | | | | | | | | |  | | | | | | | | | | | | |
| | log_yield | Coef. | | St.Err. | t-value | | p-value | [95% Conf | | Interval] | | Sig | | --- | --- | --- | --- | --- | --- | --- | --- | --- | --- | --- | --- | | avg11_msavi | 2.384 | | .32 | 7.44 | | 0 | 1.756 | | 3.011 | | *** | | Constant | 1.472 | | .216 | 6.80 | | 0 | 1.048 | | 1.896 | | *** | |  | | | | | | | | | | | | | Mean dependent var | | 3.087 | | | SD dependent var | | | 0.351 | | | R-squared | | 0.95 | | | Number of obs | | | 696.000 | | | Adj R-squared | | 0.94 | | | Root MSE | | | 0.23 | | | Chi-square | | 55.427 | | | Prob > chi2 | | | 0.000 | | | **** p<.01, ** p<.05, * p<.1* | | | | | | | | | | | | |  | | | | | | | | | | | | | | log_yield | Coef. | | St.Err. | t-value | | p-value | [95% Conf | | Interval] | | Sig | | --- | --- | --- | --- | --- | --- | --- | --- | --- | --- | --- | --- | | avg28_msavi | 2.494 | | .448 | 5.57 | | 0 | 1.615 | | 3.372 | | *** | | Constant | 1.36 | | .303 | 4.49 | | 0 | .766 | | 1.954 | | *** | |  | | | | | | | | | | | | | Mean dependent var | | 3.087 | | | SD dependent var | | | 0.351 | | | R-squared | | 0.93 | | | Number of obs | | | 696.000 | | | Adj R-squared | | 0.92 | | | Root MSE | | | 0.27 | | | Chi-square | | 30.973 | | | Prob > chi2 | | | 0.000 | | | **** p<.01, ** p<.05, * p<.1* | | | | | | | | | | | | |  | | | | | | | | | | | | |
| | log_yield | Coef. | | St.Err. | t-value | | p-value | [95% Conf | | Interval] | | Sig | | --- | --- | --- | --- | --- | --- | --- | --- | --- | --- | --- | --- | | avg31_msavi | 1.986 | | .475 | 4.19 | | 0 | 1.056 | | 2.916 | | *** | | Constant | 1.719 | | .314 | 5.47 | | 0 | 1.103 | | 2.335 | | *** | |  | | | | | | | | | | | | | Mean dependent var | | 3.087 | | | SD dependent var | | | 0.351 | | | R-squared | | 0.92 | | | Number of obs | | | 696.000 | | | Adj R-squared | | 0.91 | | | Root MSE | | | 0.27 | | | Chi-square | | 17.519 | | | Prob > chi2 | | | 0.000 | | | **** p<.01, ** p<.05, * p<.1* | | | | | | | | | | | | |  | | | | | | | | | | | | | | log_yield | Coef. | | St.Err. | t-value | | p-value | [95% Conf | | Interval] | | Sig | | --- | --- | --- | --- | --- | --- | --- | --- | --- | --- | --- | --- | | average_msavi | 2.709 | | .373 | 7.26 | | 0 | 1.978 | | 3.441 | | *** | | Constant | 1.268 | | .248 | 5.12 | | 0 | .783 | | 1.754 | | *** | |  | | | | | | | | | | | | | Mean dependent var | | 3.087 | | | SD dependent var | | | 0.351 | | | R-squared | | 0.95 | | | Number of obs | | | 696.000 | | | Adj R-squared | | 0.94 | | | Root MSE | | | 0.23 | | | Chi-square | | 52.662 | | | Prob > chi2 | | | 0.000 | | | **** p<.01, ** p<.05, * p<.1* | | | | | | | | | | | | |  | | | | | | | | | | | | |
| CIred-edge Index | |
| | log_yield | Coef. | | St.Err. | t-value | | p-value | [95% Conf | | Interval] | | Sig | | --- | --- | --- | --- | --- | --- | --- | --- | --- | --- | --- | --- | | avg1_cired | .499 | | .062 | 8.07 | | 0 | .378 | | .621 | | *** | | Constant | 2.384 | | .108 | 22.08 | | 0 | 2.172 | | 2.596 | | *** | |  | | | | | | | | | | | | | Mean dependent var | | 3.087 | | | SD dependent var | | | 0.351 | | | R-squared | | 0.95 | | | Number of obs | | | 696.000 | | | Adj R-squared | | 0.94 | | | Root MSE | | | 0.23 | | | Chi-square | | 65.170 | | | Prob > chi2 | | | 0.000 | | | **** p<.01, ** p<.05, * p<.1* | | | | | | | | | | | | |  | | | | | | | | | | | | | | log_yield | Coef. | | St.Err. | t-value | | p-value | [95% Conf | | Interval] | | Sig | | --- | --- | --- | --- | --- | --- | --- | --- | --- | --- | --- | --- | | avg8_cired | .553 | | .069 | 8.01 | | 0 | .417 | | .688 | | *** | | Constant | 2.301 | | .115 | 20.06 | | 0 | 2.076 | | 2.526 | | *** | |  | | | | | | | | | | | | | Mean dependent var | | 3.087 | | | SD dependent var | | | 0.351 | | | R-squared | | 0.95 | | | Number of obs | | | 696.000 | | | Adj R-squared | | 0.94 | | | Root MSE | | | 0.22 | | | Chi-square | | 64.176 | | | Prob > chi2 | | | 0.000 | | | **** p<.01, ** p<.05, * p<.1* | | | | | | | | | | | | |  | | | | | | | | | | | | |
| | log_yield | Coef. | | St.Err. | t-value | | p-value | [95% Conf | | Interval] | | Sig | | --- | --- | --- | --- | --- | --- | --- | --- | --- | --- | --- | --- | | avg11_cired | .543 | | .087 | 6.23 | | 0 | .372 | | .714 | | *** | | Constant | 2.272 | | .148 | 15.32 | | 0 | 1.981 | | 2.563 | | *** | |  | | | | | | | | | | | | | Mean dependent var | | 3.087 | | | SD dependent var | | | 0.351 | | | R-squared | | 0.94 | | | Number of obs | | | 696.000 | | | Adj R-squared | | 0.93 | | | Root MSE | | | 0.23 | | | Chi-square | | 38.850 | | | Prob > chi2 | | | 0.000 | | | **** p<.01, ** p<.05, * p<.1* | | | | | | | | | | | | |  | | | | | | | | | | | | | | log_yield | Coef. | | St.Err. | t-value | | p-value | [95% Conf | | Interval] | | Sig | | --- | --- | --- | --- | --- | --- | --- | --- | --- | --- | --- | --- | | avg28_cired | .5 | | .094 | 5.34 | | 0 | .317 | | .684 | | *** | | Constant | 2.371 | | .161 | 14.74 | | 0 | 2.056 | | 2.686 | | *** | |  | | | | | | | | | | | | | Mean dependent var | | 3.087 | | | SD dependent var | | | 0.351 | | | R-squared | | 0.93 | | | Number of obs | | | 696.000 | | | Adj R-squared | | 0.92 | | | Root MSE | | | 0.27 | | | Chi-square | | 28.545 | | | Prob > chi2 | | | 0.000 | | | **** p<.01, ** p<.05, * p<.1* | | | | | | | | | | | | |  | | | | | | | | | | | | |
| | log_yield | Coef. | | St.Err. | t-value | | p-value | [95% Conf | | Interval] | | Sig | | --- | --- | --- | --- | --- | --- | --- | --- | --- | --- | --- | --- | | avg31_cired | .394 | | .089 | 4.41 | | 0 | .219 | | .569 | | *** | | Constant | 2.527 | | .145 | 17.44 | | 0 | 2.243 | | 2.811 | | *** | |  | | | | | | | | | | | | | Mean dependent var | | 3.087 | | | SD dependent var | | | 0.351 | | | R-squared | | 0.92 | | | Number of obs | | | 696.000 | | | Adj R-squared | | 0.91 | | | Root MSE | | | 0.28 | | | Chi-square | | 19.468 | | | Prob > chi2 | | | 0.000 | | | **** p<.01, ** p<.05, * p<.1* | | | | | | | | | | | | |  | | | | | | | | | | | | | | log_yield | Coef. | | St.Err. | t-value | | p-value | 95% Conf | | Interval] | | Sig | | --- | --- | --- | --- | --- | --- | --- | --- | --- | --- | --- | --- | | average_cired | .64 | | .097 | 6.60 | | 0 | .45 | | .831 | | *** | | Constant | 2.183 | | .155 | 14.10 | | 0 | 1.879 | | 2.486 | | *** | |  | | | | | | | | | | | | | Mean dependent var | | 3.087 | | | SD dependent var | | | 0.351 | | | R-squared | | 0.94 | | | Number of obs | | | 696.000 | | | Adj R-squared | | 0.93 | | | Root MSE | | | 0.23 | | | Chi-square | | 43.518 | | | Prob > chi2 | | | 0.000 | | | **** p<.01, ** p<.05, * p<.1* | | | | | | | | | | | | |  | | | | | | | | | | | | |

Supplementary Figure S3. Hausman test result NDRE indices for 25% testing set

| NDRE index | |
| --- | --- |
| 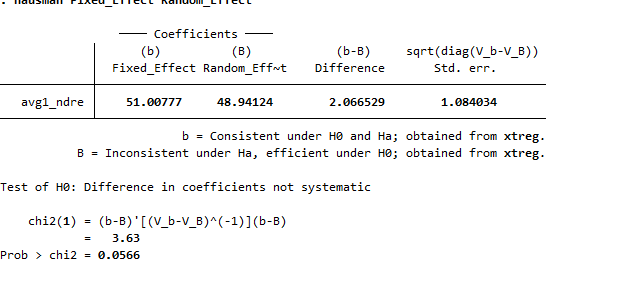 | 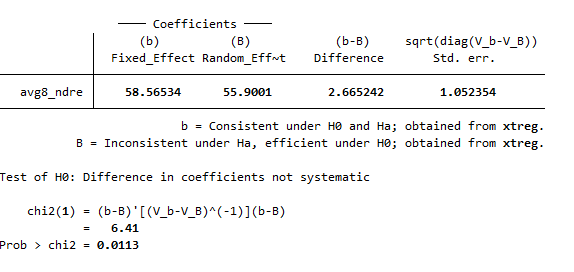 |
| 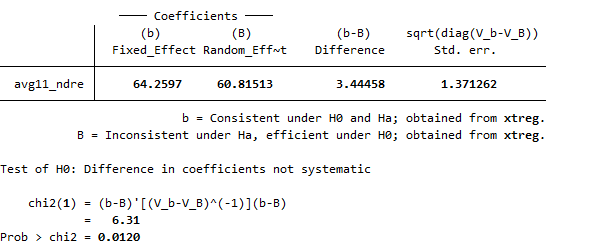 | 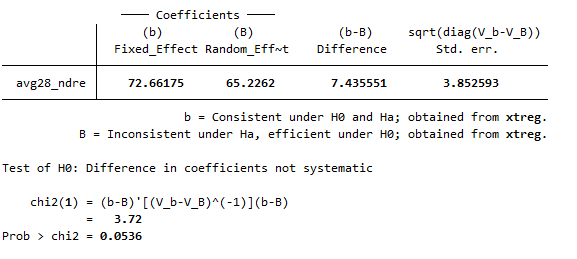 |
| 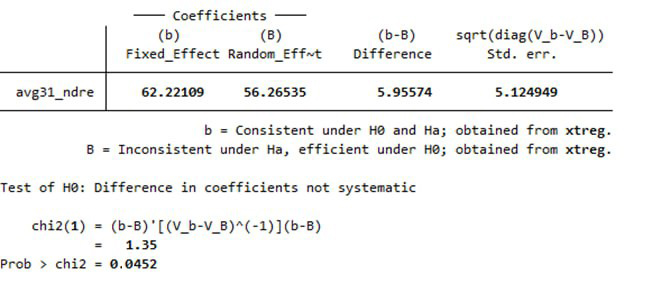 | 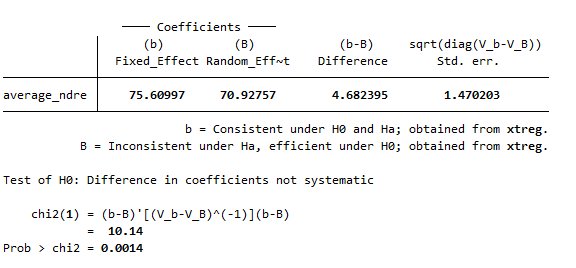 |

Supplementary Figure S4 Hausman test result NDRE indices for 75% training set

| NDVI index | |
| --- | --- |
| 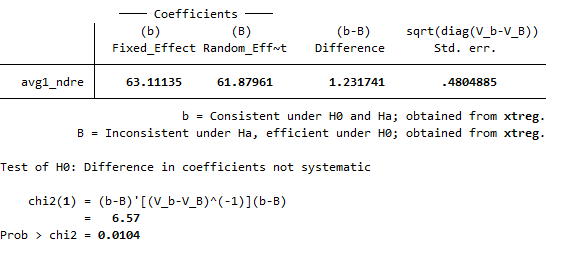 | 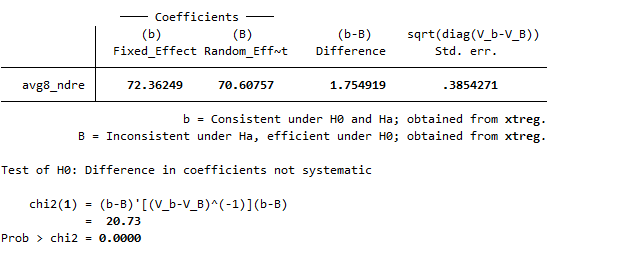 |
| 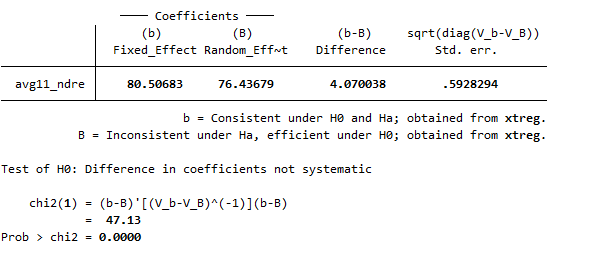 | 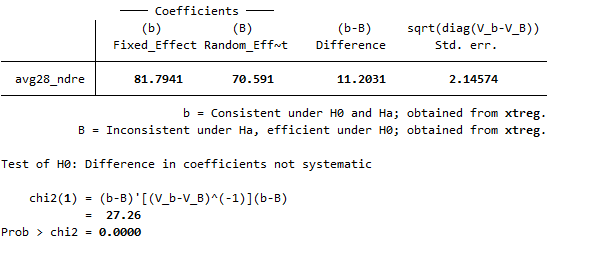 |
| 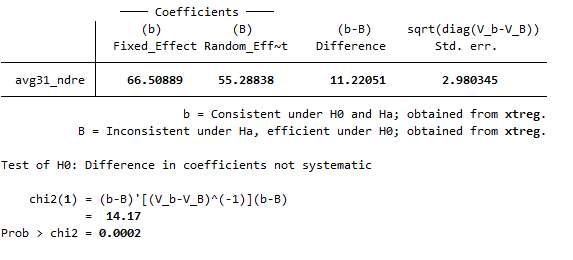 | 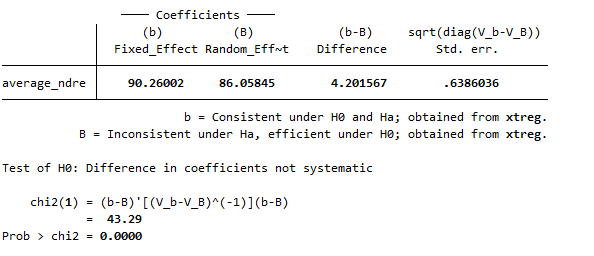 |

Supplementary Table S6. Panel fixed effect model for 25% testing set

| NDRE index | |
| --- | --- |
| | log_yield | Coef. | | St.Err. | t-value | | p-value | [95% Conf | | Interval] | | Sig | | --- | --- | --- | --- | --- | --- | --- | --- | --- | --- | --- | --- | | avg1_ndre | 2.592 | | .181 | 14.34 | | 0 | 2.23 | | 2.954 | | *** | | Constant | 2.206 | | .06 | 36.75 | | 0 | 2.086 | | 2.327 | | *** | |  | | | | | | | | | | | | | Mean depend. var | | 3.067 | | | SD dependent var | | | 0.293 | | | R-squared | | 0.693 | | | Number of obs | | | 174.000 | | | Adj R-squared | | 0.68 | | | Root MSE | | | 0.17 | | | F-test | | 205.504 | | | Prob > F | | | . | | | Akaike crit. (AIC) | | -251.924 | | | Bayesian crit. (BIC) | | | -248.765 | | | **** p<.01, ** p<.05, * p<.1* | | | | | | | | | | | | | | log_yield | Coef. | | St.Err. | t-value | | p-value | [95% Conf | | Interval] | | Sig | | --- | --- | --- | --- | --- | --- | --- | --- | --- | --- | --- | --- | | avg8_ndre | 2.99 | | .186 | 16.06 | | 0 | 2.617 | | 3.363 | | *** | | Constant | 2.058 | | .063 | 32.74 | | 0 | 1.932 | | 2.183 | | *** | |  | | | | | | | | | | | | | Mean depend. var | | 3.067 | | | SD dependent var | | | 0.293 | | | R-squared | | 0.74 | | | Number of obs | | | 174.000 | | | Adj R-squared | | 0.73 | | | Root MSE | | | 0.11 | | | F-test | | 257.973 | | | Prob > F | | | . | | | Akaike crit. (AIC) | | -279.777 | | | Bayesian crit. (BIC) | | | -276.618 | | | **** p<.01, ** p<.05, * p<.1* | | | | | | | | | | | | |
| | log_yield | Coef. | | St.Err. | t-value | | p-value | [95% Conf | | Interval] | | Sig | | --- | --- | --- | --- | --- | --- | --- | --- | --- | --- | --- | --- | | avg11_ndre | 3.283 | | .205 | 16.05 | | 0 | 2.874 | | 3.693 | | *** | | Constant | 1.911 | | .072 | 26.54 | | 0 | 1.767 | | 2.055 | | *** | |  | | | | | | | | | | | | | Mean depend. var | | 3.067 | | | SD dependent var | | | 0.293 | | | R-squared | | 0.72 | | | Number of obs | | | 174.000 | | | Adj R-squared | | 0.71 | | | Root MSE | | | 0.11 | | | F-test | | 257.733 | | | Prob > F | | | . | | | Akaike crit. (AIC) | | -267.077 | | | Bayesian crit. (BIC) | | | -263.918 | | | **** p<.01, ** p<.05, * p<.1* | | | | | | | | | | | | | | log_yield | Coef. | | St.Err. | t-value | | p-value | [95% Conf | | Interval] | | Sig | | --- | --- | --- | --- | --- | --- | --- | --- | --- | --- | --- | --- | | avg28_ndre | 3.623 | | .348 | 10.42 | | 0 | 2.927 | | 4.32 | | *** | | Constant | 1.759 | | .126 | 14.01 | | 0 | 1.507 | | 2.01 | | *** | |  | | | | | | | | | | | | | Mean depend. var | | 3.067 | | | SD dependent var | | | 0.293 | | | R-squared | | 0.428 | | | Number of obs | | | 174.000 | | | Adj R-squared | | 0.42 | | | Root MSE | | | 0.16 | | | F-test | | 108.614 | | | Prob > F | | | . | | | Akaike crit. (AIC) | | -143.464 | | | Bayesian crit. (BIC) | | | -140.305 | | | **** p<.01, ** p<.05, * p<.1* | | | | | | | | | | | | |
| | log_yield | Coef. | | St.Err. | t-value | | p-value | [95% Conf | | Interval] | | Sig | | --- | --- | --- | --- | --- | --- | --- | --- | --- | --- | --- | --- | | avg31_ndre | 2.997 | | .371 | 8.09 | | 0 | 2.255 | | 3.739 | | *** | | Constant | 1.992 | | .133 | 14.97 | | 0 | 1.725 | | 2.258 | | *** | |  | | | | | | | | | | | | | Mean depend. var | | 3.067 | | | SD dependent var | | | 0.293 | | | R-squared | | 0.256 | | | Number of obs | | | 174.000 | | | Adj R-squared | | 0.25 | | | Root MSE | | | 0.18 | | | F-test | | 65.376 | | | Prob > F | | | . | | | Akaike crit. (AIC) | | -97.664 | | | Bayesian crit. (BIC) | | | -94.505 | | | **** p<.01, ** p<.05, * p<.1* | | | | | | | | | | | | | | log_yield | Coef. | | St.Err. | t-value | | p-value | [95% Conf | | Interval] | | Sig | | --- | --- | --- | --- | --- | --- | --- | --- | --- | --- | --- | --- | | average_ndre | 3.823 | | .265 | 14.43 | | 0 | 3.293 | | 4.354 | | *** | | Constant | 1.735 | | .092 | 18.81 | | 0 | 1.551 | | 1.92 | | *** | |  | | | | | | | | | | | | | Mean depend. var | | 3.067 | | | SD dependent var | | | 0.293 | | | R-squared | | 0.717 | | | Number of obs | | | 174.000 | | | Adj R-squared | | 0.71 | | | Root MSE | | | 0.11 | | | F-test | | 208.334 | | | Prob > F | | | . | | | Akaike crit. (AIC) | | -265.620 | | | Bayesian crit. (BIC) | | | -262.461 | | | **** p<.01, ** p<.05, * p<.1* | | | | | | | | | | | | |

Supplementary Table S7. Panel fixed effect model for 75% training set

| NDRE index | |
| --- | --- |
| | log_yield | Coef. | | St.Err. | t-value | | p-value | [95% Conf | | Interval] | | Sig | | --- | --- | --- | --- | --- | --- | --- | --- | --- | --- | --- | --- | | avg1_ndre | 3.219 | | .176 | 18.27 | | 0 | 2.871 | | 3.567 | | *** | | Constant | 1.891 | | .066 | 28.73 | | 0 | 1.761 | | 2.021 | | *** | |  | | | | | | | | | | | | | Mean dependent var | | 3.093 | | | SD dependent var | | | 0.369 | | | R-squared | | 0.682 | | | Number of obs | | | 522.000 | | | Adj R-squared | | 0.67 | | | Root MSE | | | 0.14 | | | F-test | | 333.847 | | | Prob > F | | | . | | | Akaike crit. (AIC) | | -565.482 | | | Bayesian crit. (BIC) | | | -561.224 | | | **** p<.01, ** p<.05, * p<.1* | | | | | | | | | | | | | | log_yield | Coef. | | St.Err. | t-value | | p-value | [95% Conf | | Interval] | | Sig | | --- | --- | --- | --- | --- | --- | --- | --- | --- | --- | --- | --- | | avg8_ndre | 3.706 | | .193 | 19.18 | | 0 | 3.325 | | 4.088 | | *** | | Constant | 1.691 | | .073 | 23.12 | | 0 | 1.546 | | 1.835 | | *** | |  | | | | | | | | | | | | | Mean dependent var | | 3.093 | | | SD dependent var | | | 0.369 | | | R-squared | | 0.736 | | | Number of obs | | | 522.000 | | | Adj R-squared | | 0.72 | | | Root MSE | | | 0.12 | | | F-test | | 368.013 | | | Prob > F | | | . | | | Akaike crit. (AIC) | | -661.573 | | | Bayesian crit. (BIC) | | | -657.315 | | | **** p<.01, ** p<.05, * p<.1* | | | | | | | | | | | | |
| | log_yield | Coef. | | St.Err. | t-value | | p-value | [95% Conf | | Interval] | | Sig | | --- | --- | --- | --- | --- | --- | --- | --- | --- | --- | --- | --- | | avg11_ndre | 4.109 | | .241 | 17.08 | | 0 | 3.635 | | 4.584 | | *** | | Constant | 1.491 | | .094 | 15.89 | | 0 | 1.305 | | 1.676 | | *** | |  | | | | | | | | | | | | | Mean dependent var | | 3.093 | | | SD dependent var | | | 0.369 | | | R-squared | | 0.68 | | | Number of obs | | | 522.000 | | | Adj R-squared | | 0.67 | | | Root MSE | | | 0.14 | | | F-test | | 291.880 | | | Prob > F | | | . | | | Akaike crit. (AIC) | | -560.063 | | | Bayesian crit. (BIC) | | | -555.805 | | | **** p<.01, ** p<.05, * p<.1* | | | | | | | | | | | | | | log_yield | Coef. | | St.Err. | t-value | | p-value | [95% Conf | | Interval] | | Sig | | --- | --- | --- | --- | --- | --- | --- | --- | --- | --- | --- | --- | | avg28_ndre | 4.142 | | .32 | 12.94 | | 0 | 3.51 | | 4.774 | | *** | | Constant | 1.509 | | .123 | 12.31 | | 0 | 1.267 | | 1.75 | | *** | |  | | | | | | | | | | | | | Mean dependent var | | 3.093 | | | SD dependent var | | | 0.369 | | | R-squared | | 0.400 | | | Number of obs | | | 522.000 | | | Adj R-squared | | 0.39 | | | Root MSE | | | 0.19 | | | F-test | | 167.357 | | | Prob > F | | | . | | | Akaike crit. (AIC) | | -233.452 | | | Bayesian crit. (BIC) | | | -229.194 | | | **** p<.01, ** p<.05, * p<.1* | | | | | | | | | | | | |
| | log_yield | Coef. | | St.Err. | t-value | | p-value | [95% Conf | | Interval] | | Sig | | --- | --- | --- | --- | --- | --- | --- | --- | --- | --- | --- | --- | | avg31_ndre | 3.339 | | .357 | 9.36 | | 0 | 2.635 | | 4.043 | | *** | | Constant | 1.835 | | .134 | 13.65 | | 0 | 1.57 | | 2.1 | | *** | |  | | | | | | | | | | | | | Mean dependent var | | 3.093 | | | SD dependent var | | | 0.369 | | | R-squared | | 0.243 | | | Number of obs | | | 522.000 | | | Adj R-squared | | 0.23 | | | Root MSE | | | 0.21 | | | F-test | | 87.602 | | | Prob > F | | | . | | | Akaike crit. (AIC) | | -112.080 | | | Bayesian crit. (BIC) | | | -107.822 | | | **** p<.01, ** p<.05, * p<.1* | | | | | | | | | | | | | | log_yield | Coef. | | St.Err. | t-value | | p-value | [95% Conf | | Interval] | | Sig | | --- | --- | --- | --- | --- | --- | --- | --- | --- | --- | --- | --- | | average_ndre | 4.599 | | .273 | 16.87 | | 0 | 4.061 | | 5.137 | | *** | | Constant | 1.344 | | .104 | 12.97 | | 0 | 1.14 | | 1.549 | | *** | |  | | | | | | | | | | | | | Mean dependent var | | 3.093 | | | SD dependent var | | | 0.369 | | | R-squared | | 0.685 | | | Number of obs | | | 522.000 | | | Adj R-squared | | 0.67 | | | Root MSE | | | 0.14 | | | F-test | | 284.695 | | | Prob > F | | | . | | | Akaike crit. (AIC) | | -570.242 | | | Bayesian crit. (BIC) | | | -565.984 | | | **** p<.01, ** p<.05, * p<.1* | | | | | | | | | | | | |

Supplementary Table S8. Prais-Winsten model for 25% testing set

| NDRE index | |
| --- | --- |
| | log_yield | Coef. | | St.Err. | t-value | | p-value | [95% Conf | | Interval] | | Sig | | --- | --- | --- | --- | --- | --- | --- | --- | --- | --- | --- | --- | | avg1_ndre | 2.178 | | .222 | 9.82 | | 0 | 1.743 | | 2.613 | | *** | | Constant | 2.345 | | .08 | 29.42 | | 0 | 2.189 | | 2.501 | | *** | |  | | | | | | | | | | | | | Mean dependent var | | 3.067 | | | SD dependent var | | | 0.293 | | | R-squared | | 0.96 | | | Number of obs | | | 174.000 | | | Adj R-squared | | 0.95 | | | Root MSE | | | 0.18 | | | Chi-square | | 96.427 | | | Prob > chi2 | | | 0.000 | | | **** p<.01, ** p<.05, * p<.1* | | | | | | | | | | | | | | log_yield | Coef. | | St.Err. | t-value | | p-value | [95% Conf | | Interval] | | Sig | | --- | --- | --- | --- | --- | --- | --- | --- | --- | --- | --- | --- | | avg8_ndre | 2.478 | | .242 | 10.23 | | 0 | 2.003 | | 2.952 | | *** | | Constant | 2.231 | | .088 | 25.36 | | 0 | 2.058 | | 2.403 | | *** | |  | | | | | | | | | | | | | Mean dependent var | | 3.067 | | | SD dependent var | | | 0.293 | | | R-squared | | 0.97 | | | Number of obs | | | 174.000 | | | Adj R-squared | | 0.96 | | | Root MSE | | | 0.17 | | | Chi-square | | 104.708 | | | Prob > chi2 | | | 0.000 | | | **** p<.01, ** p<.05, * p<.1* | | | | | | | | | | | | |
| | log_yield | Coef. | | St.Err. | t-value | | p-value | [95% Conf | | Interval] | | Sig | | --- | --- | --- | --- | --- | --- | --- | --- | --- | --- | --- | --- | | avg11_ndre | 2.748 | | .269 | 10.22 | | 0 | 2.221 | | 3.275 | | *** | | Constant | 2.098 | | .105 | 20.03 | | 0 | 1.893 | | 2.304 | | *** | |  | | | | | | | | | | | | | Mean dependent var | | 3.067 | | | SD dependent var | | | 0.293 | | | R-squared | | 0.96 | | | Number of obs | | | 174.000 | | | Adj R-squared | | 0.95 | | | Root MSE | | | 0.17 | | | Chi-square | | 104.529 | | | Prob > chi2 | | | 0.000 | | | **** p<.01, ** p<.05, * p<.1* | | | | | | | | | | | | | | log_yield | Coef. | | St.Err. | t-value | | p-value | [95% Conf | | Interval] | | Sig | | --- | --- | --- | --- | --- | --- | --- | --- | --- | --- | --- | --- | | avg28_ndre | 2.871 | | .425 | 6.75 | | 0 | 2.038 | | 3.704 | | *** | | Constant | 2.011 | | .172 | 11.71 | | 0 | 1.675 | | 2.348 | | *** | |  | | | | | | | | | | | | | Mean dependent var | | 3.067 | | | SD dependent var | | | 0.293 | | | R-squared | | 0.94 | | | Number of obs | | | 174.000 | | | Adj R-squared | | 0.93 | | | Root MSE | | | 0.20 | | | Chi-square | | 45.620 | | | Prob > chi2 | | | 0.000 | | | **** p<.01, ** p<.05, * p<.1* | | | | | | | | | | | | |
| | log_yield | Coef. | | St.Err. | t-value | | p-value | [95% Conf | | Interval] | | Sig | | --- | --- | --- | --- | --- | --- | --- | --- | --- | --- | --- | --- | | avg31_ndre | 2.469 | | .475 | 5.20 | | 0 | 1.538 | | 3.4 | | *** | | Constant | 2.153 | | .179 | 12.06 | | 0 | 1.803 | | 2.503 | | *** | |  | | | | | | | | | | | | | Mean dependent var | | 3.067 | | | SD dependent var | | | 0.293 | | | R-squared | | 0.94 | | | Number of obs | | | 174.000 | | | Adj R-squared | | 0.93 | | | Root MSE | | | 0.22 | | | Chi-square | | 27.007 | | | Prob > chi2 | | | 0.000 | | | **** p<.01, ** p<.05, * p<.1* | | | | | | | | | | | | | | log_yield | Coef. | | St.Err. | t-value | | p-value | [95% Conf | | Interval] | | Sig | | --- | --- | --- | --- | --- | --- | --- | --- | --- | --- | --- | --- | | average_ndre | 3.057 | | .34 | 9.00 | | 0 | 2.391 | | 3.722 | | *** | | Constant | 2.001 | | .13 | 15.36 | | 0 | 1.746 | | 2.257 | | *** | |  | | | | | | | | | | | | | Mean dependent var | | 3.067 | | | SD dependent var | | | 0.293 | | | R-squared | | 0.96 | | | Number of obs | | | 174.000 | | | Adj R-squared | | 0.95 | | | Root MSE | | | 0.17 | | | Chi-square | | 80.979 | | | Prob > chi2 | | | 0.000 | | | **** p<.01, ** p<.05, * p<.1* | | | | | | | | | | | | |

Supplementary Table S9. Prais-Winsten model for 75% training set

| NDRE index | |
| --- | --- |
| | log_yield | Coef. | | St.Err. | t-value | | p-value | [95% Conf | | Interval] | | Sig | | --- | --- | --- | --- | --- | --- | --- | --- | --- | --- | --- | --- | | avg1_ndre | 2.944 | | .246 | 11.96 | | 0 | 2.462 | | 3.427 | | *** | | Constant | 1.967 | | .109 | 18.13 | | 0 | 1.755 | | 2.18 | | *** | |  | | | | | | | | | | | | | Mean dependent var | | 3.093 | | | SD dependent var | | | 0.369 | | | R-squared | | 0.95 | | | Number of obs | | | 522.000 | | | Adj R-squared | | 0.94 | | | Root MSE | | | 0.23 | | | Chi-square | | 143.088 | | | Prob > chi2 | | | 0.000 | | | **** p<.01, ** p<.05, * p<.1* | | | | | | | | | | | | | | log_yield | Coef. | | St.Err. | t-value | | p-value | [95% Conf | | Interval] | | Sig | | --- | --- | --- | --- | --- | --- | --- | --- | --- | --- | --- | --- | | avg8_ndre | 3.302 | | .24 | 13.77 | | 0 | 2.832 | | 3.772 | | *** | | Constant | 1.819 | | .105 | 17.31 | | 0 | 1.613 | | 2.025 | | *** | |  | | | | | | | | | | | | | Mean dependent var | | 3.093 | | | SD dependent var | | | 0.369 | | | R-squared | | 0.96 | | | Number of obs | | | 522.000 | | | Adj R-squared | | 0.95 | | | Root MSE | | | 0.22 | | | Chi-square | | 189.557 | | | Prob > chi2 | | | 0.000 | | | **** p<.01, ** p<.05, * p<.1* | | | | | | | | | | | | |
| | log_yield | Coef. | | St.Err. | t-value | | p-value | [95% Conf | | Interval] | | Sig | | --- | --- | --- | --- | --- | --- | --- | --- | --- | --- | --- | --- | | avg11_ndre | 3.311 | | .384 | 8.63 | | 0 | 2.559 | | 4.063 | | *** | | Constant | 1.768 | | .164 | 10.80 | | 0 | 1.447 | | 2.089 | | *** | |  | | | | | | | | | | | | | Mean dependent var | | 3.093 | | | SD dependent var | | | 0.369 | | | R-squared | | 0.94 | | | Number of obs | | | 522.000 | | | Adj R-squared | | 0.93 | | | Root MSE | | | 0.24 | | | Chi-square | | 74.510 | | | Prob > chi2 | | | 0.000 | | | **** p<.01, ** p<.05, * p<.1* | | | | | | | | | | | | | | log_yield | Coef. | | St.Err. | t-value | | p-value | [95% Conf | | Interval] | | Sig | | --- | --- | --- | --- | --- | --- | --- | --- | --- | --- | --- | --- | | avg28_ndre | 2.894 | | .588 | 4.92 | | 0 | 1.741 | | 4.046 | | *** | | Constant | 1.935 | | .235 | 8.24 | | 0 | 1.474 | | 2.395 | | *** | |  | | | | | | | | | | | | | Mean dependent var | | 3.093 | | | SD dependent var | | | 0.369 | | | R-squared | | 0.92 | | | Number of obs | | | 522.000 | | | Adj R-squared | | 0.91 | | | Root MSE | | | 0.28 | | | Chi-square | | 24.219 | | | Prob > chi2 | | | 0.000 | | | **** p<.01, ** p<.05, * p<.1* | | | | | | | | | | | | |
| | log_yield | Coef. | | St.Err. | t-value | | p-value | [95% Conf | | Interval] | | Sig | | --- | --- | --- | --- | --- | --- | --- | --- | --- | --- | --- | --- | | avg31_ndre | 2.225 | | .596 | 3.73 | | 0 | 1.057 | | 3.394 | | *** | | Constant | 2.203 | | .233 | 9.47 | | 0 | 1.747 | | 2.659 | | *** | |  | | | | | | | | | | | | | Mean dependent var | | 3.093 | | | SD dependent var | | | 0.369 | | | R-squared | | 0.91 | | | Number of obs | | | 522.000 | | | Adj R-squared | | 0.90 | | | Root MSE | | | 0.29 | | | Chi-square | | 13.928 | | | Prob > chi2 | | | 0.000 | | | **** p<.01, ** p<.05, * p<.1* | | | | | | | | | | | | | | log_yield | Coef. | | St.Err. | t-value | | p-value | [95% Conf | | Interval] | | Sig | | --- | --- | --- | --- | --- | --- | --- | --- | --- | --- | --- | --- | | average_ndre | 3.796 | | .405 | 9.38 | | 0 | 3.002 | | 4.589 | | *** | | Constant | 1.618 | | .167 | 9.71 | | 0 | 1.292 | | 1.945 | | *** | |  | | | | | | | | | | | | | Mean dependent var | | 3.093 | | | SD dependent var | | | 0.369 | | | R-squared | | 0.94 | | | Number of obs | | | 522.000 | | | Adj R-squared | | 0.93 | | | Root MSE | | | 0.24 | | | Chi-square | | 87.909 | | | Prob > chi2 | | | 0.000 | | | **** p<.01, ** p<.05, * p<.1* | | | | | | | | | | | | |
